# Supplementary material for: Birds of a Feather: Neanderthal Exploitation of Raptors and Corvids
Source: PLoS One. 2012 Sep 17;7(9):e45927. doi: 10.1371/journal.pone.0045927 (PMC3444460; doi:10.1371/journal.pone.0045927)
Supplement: Table S1 — Database of Pleistocene Palearctic sites based on fossil bird sites catalogued by Tyrberg [Nuttal Ornithol. Club, Cambridge, Mass., 27, 1998/ http:/web.telia.com/-u11502098/pleistocene.html , 2008]. This database includes all raptor and corvid species as well as corresponding archaeological and paleontological attribution. (XLS) [file pone.0045927.s001.xls]

## Sheet: Sheet1
SITE CODE	EP	MP	LP	UKN	EPA	MPA	UPA			PERAPI	%PERAPI	EXP	MILMIG	%MILMIG	EXP	MILMIL	%MILMIL	EXP	MILVUS	%MILVUS	EXP	HALALB	%HALALB	EXP	HALIAEET	%HALIAEET	EXP	GYPBAR	%GYPBAR	EXP	GYPAET	%GYPAET	EXP	NEOPER	%NEOPER	EXP	GYPFUL	%GYPFUL	EXP	GYPS	%GYPS	EXP	AEGMON	%AEGMON	EXP	AEGYP	%AEGYP	EXP	CIRGAL
AL1		1				1			MP	3	1.21457	0.749242	4	1.61943	0.499494	2	0.809717	1.49848	6	2.42915	2.99697	17	6.88259	7.99191	20	8.09717	9.98989	18	7.28745	4.2457	20	8.09717	4.2457	3	1.21457	0.998989	18	7.28745	3.99596	22	8.90688	8.74115	28	11.336	7.24267	30	12.1457	7.24267	1
AL2				1					UP	1	0.189753	1.59858	11	2.08729	1.06572	4	0.759013	3.19717	16	3.03605	6.39434	22	4.17457	17.0516	24	4.55408	21.3145	26	4.93359	9.05865	27	5.12334	9.05865	7	1.32827	2.13145	23	4.36433	8.52578	27	5.12334	18.6502	23	4.36433	15.453	24	4.55408	15.453	4
AL3				1					NONE	3	0.303337		2	0.202224		6	0.606673		12	1.21335		32	3.23559		40	4.04449		17	1.71891		17	1.71891		4	0.404449		16	1.6178		35	3.53893		29	2.93225		29	2.93225		6
AL4				1
AL5			1						MP			6.76139			24.5319			0.167849			3.00911			10.1535			10.0304			44.5582			58.4586			4.0081			49.0779			20.1114			59.4901			71.5062
AL6			1						UP			0.224138			92.6037			0.201596			14.4298			1.43605			0.338368			31.6835			35.5343			11.1205			24.5729			3.73831			3.68586			4.72734
AR1			1			1
AR2				1
AU1			1				1			GARGLA	%GARGLA	EXP	PICPIC	%PICPIC	EXP	NUCCAR	%NUCCAR	EXP	PYRGRA	%PYRGRA	EXP	PYRPYR	%PYRPYR	EXP	CORMON	%CORMON	EXP	CORFRU	%CORFRU	EXP	CORCOR	%CORCOR	EXP	CORCOX	%CORCOX	EXP
AU10			1						MP	29	11.7409	23.2265	42	17.004	23.2265	14	5.66802	10.2396	92	37.247	39.2103	78	31.5789	29.9697	51	20.6478	35.7139	15	6.07287	5.99393	36	14.5749	17.9818	50	20.2429	29.9697
AU11		1							UP	65	12.334	49.5561	73	13.852	49.5561	26	4.93359	21.8473	154	29.222	83.6593	73	13.852	63.9434	71	13.4725	76.1992	14	2.65655	12.7887	59	11.1954	38.366	107	20.3036	63.9434
AU12			1						NONE	93	9.40344		93	9.40344		41	4.1456		157	15.8746		120	12.1335		143	14.459		24	2.42669		72	7.28008		120	12.1335
AU13			1
AU14			1						MP			1.43515			15.1743			1.38094			71.0719			76.9749			6.54274			13.5319			18.0547			13.3873
AU15				1					UP			4.813			11.0908			0.78933			59.1425			1.28274			0.354749			0.114735			11.0973			28.9924
AU16			1
AU17			1			1	1
AU18			1
AU19			1
AU2	1
AU20			1				1
AU21			1
AU22			1
AU23			1
AU24			1
AU25			1
AU26		1	1
AU27			1
AU28			1
AU29			1
AU3			1				1
AU30			1
AU31			1				1
AU32			1
AU33			1
AU34			1				1
AU35			1
AU36			1
AU37			1				1
AU38			1
AU39			1
AU4				1
AU40			1
AU41			1
AU42			1				1
AU5			1				1
AU6			1			1	1
AU7		1
AU8			1				1
AU9			1				1
AZ1		1				1
AZ2		1	1
BE1		1
BE10			1				1
BE11			1				1
BE12			1				1
BE13			1
BE14			1
BE15			1				1
BE16			1				1
BE17			1				1
BE2			1			1	1
BE3			1				1
BE4			1				1
BE5				1
BE6			1				1
BE7			1			1	1
BE8			1				1
BE9			1				1
BE10			1				1
BE11			1				1
BE12			1				1
BE13			1
BE14			1
BE15			1				1
BE16			1				1
BH1			1
BH3			1				1
BH4			1
BH5			1
BH6			1
BR1			1				1
BRD1				1
BRD100			1
BRD101			1
BRD102				1
BRD103			1				1
BRD104				1
BRD105		1
BRD106			1				1
BRD107			1			1
BRD108			1
BRD109			1				1
BRD11			1
BRD110			1				1
BRD111				1
BRD112			1
BRD113				1
BRD114			1
BRD115			1
BRD116			1
BRD117				1
BRD118			1
BRD119			1			1
BRD12			1			1
BRD120			1				1
BRD121			1
BRD122			1				1
BRD123			1
BRD124			1
BRD125			1			1	1
BRD126			1
BRD127			1				1
BRD128			1
BRD129			1				1
BRD13			1				1
BRD130			1				1
BRD131			1				1
BRD132			1
BRD133			1
BRD134		1
BRD135			1
BRD136			1				1
BRD137			1				1
BRD138			1
BRD139			1
BRD14		1	1
BRD140			1
BRD141	1
BRD142			1
BRD143			1
BRD144		1
BRD145			1
BRD146			1
BRD147		1
BRD148			1				1
BRD149				1
BRD15			1			1
BRD150			1
BRD151			1				1
BRD152			1				1
BRD153			1
BRD154		1
BRD155			1
BRD156			1				1
BRD157			1
BRD158			1
BRD159			1
BRD16			1				1
BRD160			1
BRD161			1
BRD162			1
BRD163			1
BRD164			1
BRD165			1
BRD166			1			1
BRD167			1			1
BRD168			1
BRD169			1			1	1
BRD17			1
BRD170			1				1
BRD171			1			1
BRD172			1
BRD18			1			1
BRD19			1			1
BRD2			1				1
BRD20		1
BRD21			1
BRD22			1				1
BRD23			1
BRD24			1
BRD25			1
BRD26			1
BRD27			1				1
BRD28			1
BRD29			1
BRD3			1				1
BRD30		1
BRD31			1
BRD32			1				1
BRD33			1
BRD34			1
BRD35				1
BRD36			1
BRD37			1
BRD38			1				1
BRD39		1
BRD4			1
BRD40			1				1
BRD41			1
BRD42		1
BRD43			1
BRD44			1
BRD45			1
BRD46				1
BRD47			1				1
BRD48			1
BRD49			1
BRD5			1
BRD50			1				1
BRD51			1
BRD52			1			1	1
BRD53			1			1	1
BRD54			1				1
BRD55			1
BRD56			1
BRD57		1	1
BRD58			1
BRD59			1
BRD6			1
BRD60			1
BRD61			1				1
BRD62			1			1	1
BRD63			1				1
BRD64			1				1
BRD65			1
BRD66		1	1
BRD67			1
BRD68			1
BRD69			1			1
BRD7			1				1
BRD70			1				1
BRD71			1				1
BRD72			1				1
BRD73			1				1
BRD74		1	1
BRD75			1				1
BRD76			1				1
BRD77		1
BRD78			1				1
BRD79			1
BRD8			1				1
BRD80			1
BRD81		1
BRD82				1
BRD83				1
BRD84			1
BRD85			1
BRD86		1	1
BRD87		1				1
BRD88				1
BRD89			1
BRD9		1
BRD90			1				1
BRD91			1
BRD92			1
BRD93			1
BRD94		1	1
BRD95			1
BRD96			1
BRD97			1
BRD98			1				1
BRD99			1				1
BU1			1			1	1
BU10	1
BU11			1			1
BU12			1
BU13			1
BU14			1
BU15			1
BU16			1
BU17	1
BU18	1
BU2			1
BU3		1
BU4			1
BU5			1
BU6	1
BU7			1				1
BU8			1
BU9			1				1
CH1			1
CH10			1			1
CH11			1				1
CH12			1
CH13			1				1
CH14			1				1
CH15			1				1
CH16			1				1
CH17			1				1
CH18			1			1
CH19			1			1
CH2			1
CH20			1				1
CH21			1
CH22			1				1
CH23			1			1
CH24			1			1
CH25			1				1
CH26			1			1
CH27			1				1
CH28			1				1
CH29			1			1
CH3			1			1
CH30			1				1
CH31			1				1
CH4			1
CH5			1			1
CH6			1
CH7			1				1
CH8			1				1
CH9			1
CI1				1
CI10			1
CI11		1
CI12	1
CI13		1
CI14		1
CI15	1
CI16		1
CI17		1
CI18				1
CI19			1
CI2			1
CI20			1
CI21			1
CI22		1
CI23				1
CI24			1			1
CI25			1
CI26				1
CI27			1				1
CI28		1
CI3			1
CI30			1
CI31			1
CI32			1
CI33			1
CI34			1				1
CI35				1
CI36				1
CI38				1
CI39			1
CI4			1
CI40			1				1
CI41			1				1
CI42			1
CI43				1
CI44			1
CI45			1
CI46			1
CI47				1
CI48				1
CI49				1
CI50			1
CI51			1
CI52			1				1
CI53			1
CI54			1
CI55				1
CI56			1
CI57				1
CI58			1
CI59			1
CI60			1				1
CI61			1
CI62			1
CI63			1
CI64	1
CI65	1
CI66			1
CI67	1
CI68	1
CI69		1
CI7			1				1
CI8		1
CI9		1
CR1			1				1
CR10		1				1
CR11			1				1
CR12	1		1				1
CR13			1				1
CR14		1				1
CR15			1
CR16			1
CR17			1
CR18			1				1
CR19		1	1			1	1
CR2			1
CR3			1
CR4			1
CR5			1
CR6			1			1
CR7			1
CR8			1
CR9		1				1
CY1			1
CZ1			1				1
CZ10	1
CZ11			1
CZ12			1
CZ13			1
CZ14			1
CZ15				1
CZ16			1
CZ17			1
CZ18			1				1
CZ19		1
CZ2			1				1
CZ20			1
CZ22			1
CZ23			1				1
CZ24			1
CZ26			1
CZ27			1				1
CZ28			1				1
CZ29			1				1
CZ3			1
CZ30			1			1	1
CZ31			1
CZ32			1				1
CZ33		1
CZ34			1				1
CZ35			1			1	1
CZ36			1
CZ37			1				1
CZ38			1
CZ39			1
CZ4				1
CZ40			1
CZ41		1
CZ42			1
CZ43			1
CZ44			1				1
CZ45			1				1
CZ46			1
CZ47			1
CZ48			1
CZ49			1
CZ5			1				1
CZ50			1
CZ51				1
CZ52			1
CZ53	1	1
CZ54	1
CZ55		1
CZ56			1
CZ57			1
CZ6			1			1
CZ7			1
CZ8			1
CZ9			1				1
DA1			1
DA2			1
DA3			1
DA4			1
DA5			1
DA6			1
DA7			1
DA8			1
EG1			1				1
EG10		1	1
EG11		1
EG12		1	1
EG13			1				1
EG14			1				1
EG15			1				1
EG16			1				1
EG17			1				1
EG18			1				1
EG19			1				1
EG2			1				1
EG20			1				1
EG21			1				1
EG22			1				1
EG23			1				1
EG24			1				1
EG25			1				1
EG26			1				1
EG27			1				1
EG28			1				1
EG29			1				1
EG3		1
EG30			1				1
EG31			1				1
EG32			1				1
EG33			1				1
EG34			1				1
EG35			1				1
EG36			1				1
EG37			1				1
EG38			1				1
EG39			1				1
EG4			1			1
EG40			1
EG41		1
EG42			1
EG43			1
EG44			1
EG45			1
EG46			1
EG5			1
EG6		1	1
EG7		1	1
EG8		1
EG9			1
FR1			1				1
FR10			1				1
FR100			1
FR101			1				1
FR102			1			1
FR103				1
FR104			1				1
FR105			1				1
FR106			1			1	1
FR107			1				1
FR108			1				1
FR109			1
FR11			1			1
FR110			1			1	1
FR111			1			1
FR112			1				1
FR113		1	1
FR114			1				1
FR115			1				1
FR116			1				1
FR117			1
FR118			1
FR12			1				1
FR120			1
FR121		1			1
FR122			1
FR123			1
FR124			1				1
FR125			1				1
FR126		1	1
FR127			1
FR128			1				1
FR129			1				1
FR13			1			1
FR131			1				1
FR132			1
FR133			1
FR134		1				1
FR135			1				1
FR136			1				1
FR137				1
FR138			1				1
FR139			1				1
FR14			1				1
FR140			1			1	1
FR141			1				1
FR142			1				1
FR143			1
FR144			1				1
FR145			1
FR146			1
FR147		1				1
FR148			1
FR149			1			1
FR15			1				1
FR150			1				1
FR151			1				1
FR152		1	1			1
FR153				1
FR154			1				1
FR155			1				1
FR156			1				1
FR157		1
FR158			1				1
FR159			1				1
FR16			1				1
FR160			1
FR162			1			1
FR163			1
FR164		1
FR165			1				1
FR166			1
FR167				1
FR168			1				1
FR169			1				1
FR17			1
FR170			1			1	1
FR171		1
FR172			1				1
FR173			1				1
FR174			1				1
FR175			1			1
FR176			1				1
FR177		1
FR178			1				1
FR179				1
FR18			1				1
FR180			1
FR181			1				1
FR182			1			1	1
FR183			1				1
FR184			1				1
FR185			1				1
FR186			1				1
FR187	1
FR188			1
FR189	1
FR19			1			1
FR190				1
FR191			1
FR192			1				1
FR193			1
FR194			1				1
FR195				1
FR196	1
FR197		1				1
FR198			1				1
FR199				1
FR2			1			1	1
FR20			1				1
FR200			1
FR201			1				1
FR202		1
FR203		1
FR204	1
FR205				1
FR206			1				1
FR207			1			1	1
FR208				1
FR209			1
FR21			1
FR210			1				1
FR211		1
FR212		1
FR213			1				1
FR214			1
FR215			1			1
FR216			1			1
FR217			1			1
FR218				1
FR219			1			1	1
FR22			1				1
FR220			1			1
FR221			1				1
FR222			1				1
FR223			1
FR224			1			1
FR225			1				1
FR226			1				1
FR227			1				1
FR228			1				1
FR229			1				1
FR23			1				1
FR230			1				1
FR231			1				1
FR232			1				1
FR233			1				1
FR234				1
FR235			1			1	1
FR236			1				1
FR237			1
FR238	1
FR239			1				1
FR24			1				1
FR240			1			1	1
FR241			1				1
FR242		1				1
FR243			1
FR244				1
FR245			1			1	1
FR246			1				1
FR247			1				1
FR248			1
FR249			1				1
FR25			1				1
FR250			1				1
FR251			1			1
FR252		1
FR254			1				1
FR255			1				1
FR256			1				1
FR257				1
FR258		1
FR259		1
FR26			1				1
FR260			1
FR261			1
FR262			1				1
FR263			1
FR264		1				1
FR265			1				1
FR266			1				1
FR267			1
FR268			1
FR269		1
FR27			1				1
FR270		1
FR271		1
FR272		1
FR273			1				1
FR274			1				1
FR275			1			1
FR276			1			1
FR277			1			1
FR278		1
FR279		1
FR28			1				1
FR280			1
FR281			1
FR282		1	1			1	1
FR283			1			1
FR284			1			1
FR285			1
FR29			1			1	1
FR3			1				1
FR30			1
FR31				1
FR32			1				1
FR33			1
FR34			1
FR35				1
FR36			1				1
FR37		1
FR38			1			1	1
FR39			1			1
FR4			1				1
FR40			1				1
FR41			1				1
FR42			1			1	1
FR43			1				1
FR44			1				1
FR45			1				1
FR46			1				1
FR47			1				1
FR48			1				1
FR49			1				1
FR5			1				1
FR50			1				1
FR51	1
FR52			1				1
FR53			1				1
FR54		1
FR55				1
FR56		1
FR57		1
FR58			1			1	1
FR59		1
FR6			1				1
FR60			1
FR61			1			1
FR62				1
FR63			1				1
FR65			1
FR67		1				1
FR68			1				1
FR69			1			1
FR7			1				1
FR70			1				1
FR71			1
FR72				1
FR73				1
FR74			1				1
FR75			1				1
FR76			1				1
FR77			1
FR78		1
FR79			1				1
FR8			1				1
FR80			1				1
FR81			1				1
FR82				1
FR83			1				1
FR84		1	1		1
FR86			1				1
FR87			1				1
FR88				1
FR89			1
FR9			1				1
FR90			1				1
FR91				1
FR92			1
FR93			1
FR94			1
FR95			1				1
FR96			1				1
FR97			1				1
FR98			1
FR99			1				1
GE1				1
GE10			1			1	1
GE11			1			1
GE12			1				1
GE13			1				1
GE14			1			1	1
GE15			1				1
GE16			1				1
GE17			1			1	1
GE18			1				1
GE19		1	1			1
GE2	1		1
GE20			1			1
GE21			1				1
GE22	1
GE3			1				1
GE4	1				1
GE5			1			1
GE6			1				1
GE7			1				1
GE8			1				1
GE9			1			1	1
GR1				1
GR10			1
GR11			1
GR12				1
GR13		1
GR14			1
GR15			1
GR16			1
GR18	1
GR19		1
GR2		1	1
GR20			1
GR21			1
GR22			1
GR23			1				1
GR24			1
GR3			1
GR4			1
GR5			1
GR6			1
GR7			1
GR8			1
GR9			1			1
HU1			1
HU10		1
HU11			1
HU12		1
HU13			1			1
HU14			1
HU15			1
HU16			1			1
HU17			1
HU18			1
HU19		1
HU2			1				1
HU20			1				1
HU21			1			1	1
HU22			1
HU23			1			1
HU24			1				1
HU25	1
HU26	1
HU27			1
HU28	1
HU29			1
HU3			1				1
HU30			1
HU31	1
HU32	1
HU33	1
HU34	1
HU35	1
HU36			1				1
HU37			1
HU38			1
HU39			1
HU4	1	1
HU40			1
HU41			1				1
HU42			1
HU43			1			1
HU44			1
HU45			1
HU46	1
HU47			1			1
HU48		1	1
HU49		1
HU5	1
HU50			1
HU51		1	1
HU52			1
HU53				1
HU54			1			1
HU55			1
HU56			1			1
HU57			1
HU58		1
HU59		1
HU6			1
HU60		1
HU61		1
HU62		1
HU63		1
HU64			1				1
HU65		1
HU66	1
HU67	1
HU68			1
HU69		1
HU7			1			1
HU70	1
HU8			1
HU9			1				1
IC1			1
IR1			1
IR10			1
IR11			1
IR2			1
IR3			1
IR4			1
IR5			1
IR6			1
IR7			1
IR8			1
IR9			1
IRN1			1
IRN2			1			1	1
IRQ1			1			1
IRQ2			1				1
IRQ3			1				1
IRQ4			1
IRQ5			1
IS1			1				1
IS10			1				1
IS11			1			1	1
IS12			1				1
IS13			1				1
IS14			1				1
IS15			1				1
IS16			1			1
IS17			1			1
IS18			1				1
IS19			1			1
IS2			1				1
IS20		1				1
IS21			1				1
IS22			1				1
IS23			1				1
IS24			1				1
IS25			1			1
IS26			1				1
IS27			1				1
IS28			1				1
IS29			1				1
IS3			1				1
IS30			1				1
IS31			1				1
IS32			1				1
IS33			1				1
IS34		1				1
IS35	1				1
IS36			1				1
IS37			1				1
IS38		1
IS39			1				1
IS4			1				1
IS40			1
IS41			1				1
IS42			1				1
IS43			1			1
IS44			1				1
IS45			1				1
IS46			1				1
IS47			1				1
IS48		1				1
IS5			1				1
IS6			1				1
IS7			1				1
IS8			1			1
IS9			1				1
IT1			1
IT10			1
IT100			1			1
IT101		1
IT102		1
IT103		1
IT104			1				1
IT105		1
IT106			1			1
IT107				1
IT108			1
IT109			1			1	1
IT11			1
IT110				1
IT111				1
IT112			1			1
IT113		1				1
IT114	1
IT115			1
IT116			1			1
IT117			1				1
IT118		1				1
IT119			1				1
IT12		1
IT120			1
IT121	1
IT122				1
IT123		1
IT124	1
IT125			1			1
IT126		1
IT127		1
IT128			1			1
IT129		1
IT13			1				1
IT130		1
IT131		1
IT132			1
IT133			1				1
IT134			1
IT135			1
IT136			1			1
IT137			1
IT138			1
IT139		1
IT14			1
IT140		1
IT141		1
IT142		1
IT143		1
IT144		1
IT145			1
IT146			1
IT147			1
IT148			1
IT149			1
IT15			1
IT150			1
IT151			1				1
IT152	1
IT153	1
IT154	1
IT155	1
IT156	1
IT157	1
IT158		1
IT159		1
IT16			1			1
IT160		1
IT161		1
IT162		1
IT163	1
IT164			1				1
IT165			1				1
IT166			1
IT167			1
IT168			1
IT169			1				1
IT17		1				1
IT18			1
IT19			1
IT2			1			1
IT20		1
IT21		1
IT22	1
IT23				1
IT24			1
IT25			1			1
IT26				1
IT27			1
IT28		1
IT29			1
IT3			1				1
IT30			1			1
IT31			1
IT32			1
IT33			1
IT34			1
IT35			1
IT36		1
IT37				1
IT38			1
IT39			1
IT4			1			1
IT40			1			1	1
IT41			1			1
IT42			1			1
IT43			1
IT44			1				1
IT45			1				1
IT46			1				1
IT47			1
IT48				1
IT49			1			1
IT5				1
IT50		1	1
IT51			1
IT52			1			1
IT53			1			1	1
IT54			1
IT55			1			1
IT56			1
IT57				1
IT58			1			1
IT59			1				1
IT6			1
IT60			1
IT61			1
IT62			1
IT63			1
IT64				1
IT65				1
IT66			1				1
IT67			1
IT68				1
IT69			1			1
IT7			1
IT70			1
IT71			1			1	1
IT72			1
IT73			1			1
IT74			1
IT75		1				1
IT76		1			1
IT78	1
IT79		1
IT8			1			1
IT80				1
IT82		1	1
IT83		1
IT84			1
IT85		1				1
IT86			1				1
IT87				1
IT88			1				1
IT89			1
IT9				1
IT90		1
IT91			1
IT92		1
IT93		1				1
IT94			1			1
IT95			1				1
IT96			1			1
IT97			1			1	1
IT98				1
IT99			1			1
JA1				1
JA10			1
JA11				1
JA12			1
JA13			1
JA14				1
JA15				1
JA16				1
JA17			1
JA18		1	1
JA19				1
JA2				1
JA20			1
JA21			1
JA22			1
JA23			1
JA24			1
JA25			1
JA26			1
JA3			1
JA4				1
JA5			1
JA6				1
JA7				1
JA8				1
JA9			1
JO1			1				1
JO10			1				1
JO11			1
JO2			1			1
JO3			1				1
JO4			1			1
JO5			1				1
JO6			1				1
JO7			1				1
JO8			1				1
JO9			1				1
KA1			1
KI1			1
KI2			1
KR1			1				1
LB1				1
LB2			1			1	1
LB3		1
LI1			1				1
LI2			1			1	1
LI3			1				1
LU1			1				1
MA1				1
MA10				1
MA11				1
MA12				1
MA2				1
MA3				1
MA4		1	1				1
MA5				1
MA6				1
MA7				1
MA8				1
MA9			1
MG1				1
MG2				1
MG3			1			1	1
MG4				1
MG5				1
MG6				1
MG7				1
MG8				1
MG9				1
MK1			1
MN1			1				1
MN2			1			1	1
MN3			1				1
MO1			1			1	1
MO2			1
MO3			1			1	1
MO4			1				1
MO5			1			1	1
MO6				1
MO7	1
MR1		1
MR2		1	1
MR3			1
MR4			1
MR5			1
MR6		1
MR7			1				1
NE1			1
NE2		1
NE3	1
NE4			1
NE5			1
NO1			1
NO2			1
NO3			1
NO4			1
NO5			1
PG1				1
PG10			1
PG2			1
PG3			1			1
PG4			1				1
PG5			1
PG6			1
PG7			1			1	1
PG8			1			1	1
PG9		1				1
PO1		1
PO10		1				1
PO11			1			1
PO13			1			1	1
PO14			1				1
PO15			1
PO16			1				1
PO17			1			1
PO18			1
PO19			1
PO2			1
PO20			1
PO21			1
PO22			1
PO23			1
PO24			1				1
PO25			1
PO26	1
PO27			1				1
PO28	1
PO29			1
PO3			1
PO30			1
PO31			1
PO32			1
PO33			1
PO34			1
PO35			1
PO36			1
PO37			1
PO38			1
PO39			1
PO4			1
PO40			1				1
PO5			1
PO6			1
PO7	1
PO8			1
RM1			1
RM10			1
RM11			1			1
RM12			1			1	1
RM13			1				1
RM14			1				1
RM15			1
RM16			1			1
RM18			1				1
RM19			1
RM2	1
RM20			1
RM21			1
RM22			1
RM23			1
RM24			1
RM25			1
RM26			1
RM27			1
RM28			1
RM29			1
RM3			1
RM30			1
RM31			1
RM32			1
RM33			1			1
RM34			1
RM4			1				1
RM5				1
RM6			1				1
RM7	1	1
RM8			1
RM9			1			1
RO1			1
RO10			1				1
RO11			1				1
RO12			1			1	1
RO13			1
RO14			1			1
RO15			1				1
RO16			1
RO17			1				1
RO18			1
RO19			1
RO2			1				1
RO20			1
RO21			1				1
RO22	1
RO23			1			1
RO24			1				1
RO25			1			1
RO26			1
RO27			1			1
RO28			1			1
RO29	1
RO3			1			1	1
RO30			1				1
RO31				1
RO32				1
RO33			1
RO34			1
RO35			1				1
RO36			1				1
RO37			1
RO38			1			1
RO39				1
RO4			1				1
RO40			1			1
RO41			1				1
RO42			1				1
RO43			1			1
RO44			1
RO45			1				1
RO46			1			1	1
RO47		1
RO48			1
RO49			1
RO5			1			1
RO50		1
RO51			1
RO52			1
RO53			1
RO54			1
RO55			1
RO56			1
RO57			1
RO58			1
RO59			1
RO6			1				1
RO60			1
RO61			1
RO62			1
RO63			1				1
RO64			1			1
RO65			1
RO66			1
RO67			1			1
RO68			1				1
RO69			1
RO7			1				1
RO70			1
RO72			1			1
RO73			1
RO74			1
RO75			1
RO76			1				1
RO77			1				1
RO78			1				1
RO79			1				1
RO8			1				1
RO80			1				1
RO81			1
RO82			1
RO83			1
RO84			1
RO85			1
RO86			1				1
RO9			1
SA1			1
SA2			1
SA3			1
SA4			1
SA5			1
SA6			1
SK1			1
SK10			1
SK11			1
SK12	1
SK13			1			1
SK2			1			1	1
SK3			1
SK4		1
SK5	1
SK7			1
SK8			1
SK9				1
SL1			1			1	1
SL10			1
SL2			1
SL3			1				1
SL4			1				1
SL5			1
SL6			1
SL7			1
SL8			1
SL9			1
SP1			1			1
SP10		1				1
SP100	1	1			1
SP101	1
SP102			1			1
SP103			1
SP104			1
SP105			1			1
SP106		1				1
SP107			1			1
SP108			1			1	1
SP109			1
SP11			1
SP110			1
SP111	1
SP112				1
SP113			1
SP114	1
SP115			1
SP116		1
SP117		1
SP118			1
SP119		1
SP12		1	1			1
SP120			1
SP121	1
SP122		1
SP123			1
SP124			1
SP125			1
SP126			1				1
SP127			1			1
SP128			1				1
SP129	1
SP13			1
SP130			1
SP131	1
SP132			1			1
SP133			1				1
SP134			1				1
SP135			1				1
SP136			1
SP137			1			1
SP138			1			1
SP139			1
SP14			1				1
SP140			1
SP141			1				1
SP142			1			1
SP143			1
SP144			1				1
SP145			1				1
SP146			1				1
SP147		1
SP148		1
SP149			1
SP15			1				1
SP16			1
SP17			1
SP18			1
SP19	1
SP2			1				1
SP20			1
SP21			1			1
SP22			1
SP23			1
SP24			1
SP25			1
SP26			1
SP27			1
SP28			1				1
SP29			1
SP3			1				1
SP30			1				1
SP31			1				1
SP32			1
SP33			1				1
SP34			1				1
SP35			1				1
SP36			1				1
SP37			1				1
SP38			1				1
SP39			1
SP4			1				1
SP40			1				1
SP41			1				1
SP42			1				1
SP43			1				1
SP44			1			1
SP45			1			1
SP46			1				1
SP47			1
SP48			1
SP49			1			1
SP5		1
SP50			1			1
SP51			1
SP52			1				1
SP53			1			1
SP54			1				1
SP55			1			1	1
SP56			1
SP57			1				1
SP58			1			1
SP59			1				1
SP6		1				1
SP60			1
SP61			1
SP62			1			1	1
SP63	1
SP64			1			1	1
SP65			1				1
SP66	1
SP67			1
SP68			1				1
SP69			1
SP7			1			1	1
SP70			1			1
SP71			1				1
SP72			1
SP73			1				1
SP74	1
SP75		1				1
SP76			1				1
SP77			1				1
SP78			1				1
SP79			1
SP8			1				1
SP80				1
SP81			1
SP82		1				1
SP83			1				1
SP84	1
SP85	1
SP86	1
SP87			1				1
SP88			1
SP89	1
SP9		1				1
SP90			1			1
SP91			1				1
SP92				1
SP94			1				1
SP95			1
SP96			1
SP97			1				1
SP98			1
SP99			1
SR1			1
SR2			1
SR3			1
SR4			1
SV1			1
SV2			1
SV3			1
SV4			1
SV5			1
SV6			1
SV7			1
SV8			1
SV9			1
SY1			1			1
SY2			1				1
SY3			1			1
TA1	1
TK1		1
TK2		1	1
TK3	1
TK4	1
TK5			1				1
TM1		1
TM2	1
TU1	1
UK1		1
UK10			1
UK11		1
UK12			1
UK13			1
UK14			1
UK15			1			1
UK16		1
UK17			1
UK18			1
UK19				1
UK2			1
UK20			1
UK21			1
UK22			1
UK23		1
UK24			1
UK25			1
UK26			1				1
UK27			1
UK28			1
UK29			1
UK3			1
UK30		1	1
UK31			1
UK32		1	1
UK33			1
UK34		1	1
UK35			1			1	1
UK38			1
UK39			1
UK4			1
UK40			1
UK41			1
UK42			1
UK43			1
UK44			1
UK45		1
UK46			1
UK47			1			1
UK48			1
UK49		1
UK5			1
UK50		1
UK51			1
UK52			1			1	1
UK53			1
UK54			1
UK55			1			1	1
UK56			1
UK57			1				1
UK58			1
UK59			1
UK6			1
UK60		1
UK61		1
UK62			1
UK63			1
UK64			1
UK65			1
UK66			1
UK67		1	1
UK68		1
UK69		1
UK7			1
UK71	1
UK72		1
UK73			1
UK74			1			1
UK75		1
UK76		1
UK77			1
UK78			1
UK79		1
UK8				1
UK80		1	1
UK9			1				1
UR1		1				1	1
UR10			1
UR11			1			1
UR12	1	1
UR13			1				1
UR14			1				1
UR15		1
UR17			1				1
UR18			1
UR19			1			1
UR2			1				1
UR20			1			1
UR21		1
UR22		1				1
UR23			1
UR24			1				1
UR25			1				1
UR26	1
UR27			1				1
UR28			1			1
UR29			1			1
UR30			1
UR31	1
UR32	1
UR33	1
UR34			1
UR35	1
UR36	1
UR37			1
UR4			1			1
UR5			1				1
UR6			1				1
UR7			1				1
UR8			1				1
UR9			1			1
UZ1			1			1
	92	208	1320	121	6	241	527
[truncated: 95 more columns]

## Sheet: Table S1
Table S1. Database of Pleistocene Palearctic sites based on fossil bird sites catalogued by Tyrberg [Nuttal Ornithol. Club, Cambridge, Mass., 27, 1998 / http:/web.telia.com/-u11502098/pleistocene.html, 2008].
SITE	Country	EPA	MPA	UPA	COU	EP	MP	LP	UKN	MILMIG	MILMIL	HALALB	GYPBAR	NEOPER	GYPFUL	AEGMON	BUTLAG	AQUCHR	PICPIC	CORMON	CORFRU	CORCOR	CORCOX	FALTIN	FALNAU	PYRGRA	PYRPYR	COUNT	%COUNT
Gorham's Cave (Gibraltar)	Gibraltar		1	1	2			1		1	1	1	1	1	1		1	1	1	1		1	1	1	1	1	1	16	88.8889
Isturitz (Pyrenees-Atlantiques)	France			1	1			1					1	1	1	1	1	1	1	1		1	1	1		1	1	13	72.2222
Sandalja II	Croatia			1	1			1				1		1	1	1		1	1	1		1	1	1		1	1	12	66.6667
Arene Candide (Liguria)	Italy			1	1			1				1					1	1	1	1	1	1	1	1	1	1	1	12	66.6667
Grotta Romanelli (Puglia)	Italy		1	1	2			1		1		1			1	1	1	1	1	1		1	1	1		1		12	66.6667
Binagady	Azerbaijan				0		1	1				1		1	1	1		1	1	1	1	1	1	1				11	61.1111
Grotte de l'Observatoire (Monaco)	France				0			1				1	1		1	1		1	1			1	1	1		1	1	11	61.1111
Grotte du Lazaret (Alpes-Maritimes)	France		1		1		1					1	1			1		1	1	1		1	1	1		1	1	11	61.1111
Soulabe (Arage)	France		1	1	2			1				1	1		1			1	1	1			1	1	1	1	1	11	61.1111
Grotta dei Colombi (Liguria)	Italy			1	1			1							1		1	1	1	1	1	1	1	1		1	1	11	61.1111
Grotta del Principe (Liguria)	Italy		1		1			1			1	1			1	1		1	1			1	1	1		1	1	11	61.1111
Grottes de Grimaldi (Liguria)	Italy				0			1			1	1	1			1			1		1		1	1	1	1	1	11	61.1111
Grotte du Lazaret, Locus VIII (Alpes-Maritimes)	France				0			1					1			1		1	1	1		1	1	1		1	1	10	55.5556
La Fage (Correze)	France				0		1			1						1		1	1	1			1	1	1	1	1	10	55.5556
Hayonim Cave (Galilee)	Israel		1	1	2			1						1	1	1		1	1	1		1		1	1		1	10	55.5556
Tecchia di Equi (Toscana)	Italy		1	1	2			1				1						1	1	1	1	1	1	1		1	1	10	55.5556
Cala della Calcina (Sardegna)	Italy				0			1			1		1			1		1			1	1	1	1		1	1	10	55.5556
Pestera Bordu Mare (Hunedoara)	Romania		1	1	2			1				1	1			1		1	1	1		1	1	1		1		10	55.5556
Cau d'en Borras (Castello)	Spain		1		1			1				1				1		1	1	1		1		1	1	1	1	10	55.5556
Cueva de Valdegoba (Burgos)	Spain		1		1			1		1			1		1	1	1		1					1	1	1	1	10	55.5556
Tell Mureybet	Syria			1	1			1		1		1		1	1	1		1	1			1		1	1			10	55.5556
Syuren I (Krim)	Ukraine			1	1			1									1	1	1	1	1	1		1	1	1	1	10	55.5556
Devetashka Cave	Bulgaria		1		1			1									1		1	1	1	1	1	1		1	1	9	50
Certova Dira (Moravia)	Czech Republic		1		1			1		1							1	1	1	1		1	1	1		1		9	50
La Madeleine (Dordogne)	France			1	1			1					1			1		1	1	1		1	1	1		1		9	50
Orgnac 3 (Ardeche)	France				0		1						1						1	1		1	1	1	1	1	1	9	50
Castiglione 3 (Haute-Corse)	France				0		1						1		1			1	1	1		1	1			1	1	9	50
Caune de l'Arago (Pyrenees-Orientale)	France				0		1						1			1		1	1			1	1	1		1	1	9	50
Atapuerca (La Galeria) (Burgos)	Spain		1		1		1					1				1			1	1			1	1	1	1	1	9	50
Arbreda (Gerona)	Spain		1	1	2			1										1	1	1		1	1	1	1	1	1	9	50
Azykh (Nagorno Karabakh)	Azerbaijan		1		1		1					1	1			1		1						1	1	1	1	8	44.4444
Kogelstein (Baden-Württemberg)	Germany		1		1			1				1			1		1	1	1				1	1		1		8	44.4444
Choukoutien, Upper Cave (Hopei)	China			1	1			1				1	1			1		1		1		1		1			1	8	44.4444
Grotte de Gourdan (Haute Garonne)	France			1	1			1				1				1			1			1	1	1		1	1	8	44.4444
Grotte de la Vache (Ariege)	France			1	1			1				1	1		1	1			1				1			1	1	8	44.4444
Grottes des Romains (Ain)	France			1	1			1					1					1	1			1	1	1		1	1	8	44.4444
Grotte Nord-Ouest de la Grotte de la Coscia (Corse)	France				0			1				1			1				1			1	1	1		1	1	8	44.4444
Baume de Gigny (Jura)	France			1	1			1										1	1	1		1	1	1		1	1	8	44.4444
Liko Cave (Crete)	Greece				0			1				1	1		1	1		1		1				1		1		8	44.4444
Kebara (Galilee)	Israel		1		1			1							1	1			1	1		1	1	1		1		8	44.4444
Kebara + Qafzeh (Galilee)	Israel		1		1			1							1	1			1	1		1	1	1		1		8	44.4444
Grotta della Madonna (Calabria)	Italy			1	1			1			1							1		1		1	1	1		1	1	8	44.4444
Buca d'Equi (Lucca)	Italy				0				1			1						1	1		1	1	1	1			1	8	44.4444
Pestera Curata (Hunedoara)	Romania		1		1			1				1				1	1			1		1	1	1		1		8	44.4444
Ibex Cave (Gibraltar)	Gibraltar		1		1			1				1	1					1				1	1	1	1		1	8	44.4444
Victoria (Murcia)	Spain				0	1				1						1			1	1	1				1	1	1	8	44.4444
Aitzbitarte IV (Guipuzcoa)	Spain			1	1			1					1						1	1		1	1	1		1	1	8	44.4444
Cova des Cendres (Alicante)	Spain			1	1			1										1	1	1		1		1	1	1	1	8	44.4444
Es Pouas (Eivissa)	Spain				0			1				1								1		1	1	1	1	1	1	8	44.4444
Reclau Viver (Gerona)	Spain			1	1			1							1			1	1	1			1	1		1	1	8	44.4444
Smolucka Pecina	Serbia				0			1							1			1	1	1	1	1		1			1	8	44.4444
Pin Hole Cave (Derbyshire)	United Kingdom		1	1	2			1									1	1	1	1	1	1	1	1				8	44.4444
Sandalja I	Croatia			1	1	1		1								1			1	1		1	1	1		1		7	38.8889
Vindija	Croatia		1	1	2		1	1											1	1	1	1	1			1	1	7	38.8889
Stranska Skala (Moravia)	Czech Republic				0		1					1							1	1		1	1	1		1		7	38.8889
Grotte de Lourdes (Hautes-Garonne)	France			1	1			1										1	1			1	1	1		1	1	7	38.8889
Grotte de Macinaggio (Corse)	France				0			1							1		1	1				1	1	1			1	7	38.8889
Roc de Combe (Lot)	France			1	1			1							1			1		1			1	1		1	1	7	38.8889
Tournal (Aude)	France		1	1	2			1					1					1		1			1	1		1	1	7	38.8889
Balauziere (Gard)	France		1	1	2			1					1					1	1		1			1		1	1	7	38.8889
Combe Grenal (Dordogne)	France		1		1			1								1		1	1				1	1		1	1	7	38.8889
Abri Lafaye (Tarn-et-Garonne)	France			1	1			1					1			1		1					1	1		1	1	7	38.8889
Khupyn-Ipshakhva (Abkhazia)	Georgia			1	1			1				1	1		1			1					1	1		1		7	38.8889
Pesko (Bukk)	Hungary			1	1			1											1	1	1		1	1		1	1	7	38.8889
Pilisszanto 1 (Pilis)	Hungary				0			1										1	1	1	1		1	1		1		7	38.8889
Grotta Rapaci (Sardegna)	Italy				0			1					1		1			1		1			1	1		1		7	38.8889
Grotta di Cardamone (Puglia)	Italy				0			1				1					1	1				1	1	1			1	7	38.8889
Riparo di Fumane (Verona)	Italy		1	1	2			1									1	1	1	1			1	1		1		7	38.8889
Gruta de Caldeirao	Portugal		1	1	2			1					1		1	1			1				1			1	1	7	38.8889
Krucza Skala (Czestochowa uplands)	Poland				0			1									1			1	1	1	1	1			1	7	38.8889
Ripa (Bihor)	Romania		1		1			1							1					1	1	1		1	1	1		7	38.8889
Cuina Turcului (Caras-Severin)	Romania			1	1			1					1						1	1	1	1	1			1		7	38.8889
Ust'-Kanskaya Peshchera (Gorno-Altai)	Russia		1		1			1											1	1		1	1	1		1	1	7	38.8889
Vanguard Cave (Gibraltar)	Gibraltar		1		1			1				1		1	1					1			1		1		1	7	38.8889
Cova Negra DeBellus (Valencia)	Spain		1		1			1										1	1			1		1	1	1	1	7	38.8889
Cueva de Nerja (Malaga)	Spain			1	1			1			1		1									1	1	1		1	1	7	38.8889
Cueva de Santimamine (Vizcaya)	Spain			1	1			1										1	1			1	1	1		1	1	7	38.8889
Devil's Tower (Gibraltar)	Gibraltar		1		1			1				1			1	1								1	1	1	1	7	38.8889
Petersfels (Baden-Wurttemberg)	Germany			1	1			1				1						1		1		1	1			1		6	33.3333
Cave No 16	Bulgaria				0			1											1	1	1		1	1		1		6	33.3333
Temnata Cave	Bulgaria				0			1								1		1	1	1				1		1		6	33.3333
Sipka (Moravia)	Czech Republic			1	1			1										1	1	1		1	1	1				6	33.3333
Abri Pataud (Dordogne)	France			1	1			1					1		1	1				1			1			1		6	33.3333
Grotte de l'Escale a Saint-Esteve-Janson (Bouche-du-Rhone)	France				0		1					1	1					1	1						1	1		6	33.3333
Hortus (Herault)	France		1		1			1							1					1		1		1		1	1	6	33.3333
La Ferrasie (Dordogne)	France			1	1			1					1			1		1					1	1		1		6	33.3333
Mas de Caves a Lunel-Viel (Herault)	France		1		1		1											1	1	1		1	1		1			6	33.3333
Pech de l'Aze I (Dordogne)	France		1		1			1										1	1					1	1	1	1	6	33.3333
Salpetre a Pompignan (Herault)	France		1	1	2			1											1				1	1	1	1	1	6	33.3333
Aurensan inferieure (Hautes-Pyrenees)	France			1	1			1					1					1				1		1		1	1	6	33.3333
Bois du Cantet (Hautes-Pyrenees)	France			1	1			1										1	1				1	1		1	1	6	33.3333
Kudaro 1 (South Ossetia)	Georgia		1	1	2			1					1			1		1						1		1	1	6	33.3333
Puskaporos (Bukk)	Hungary			1	1			1				1					1		1				1	1		1		6	33.3333
Ohalo 2 (Galilee)	Israel			1	1			1		1		1								1	1	1		1				6	33.3333
Tana del Colombo (Liguria)	Italy		1		1			1											1		1	1			1	1	1	6	33.3333
Torre Nave (Calabria)	Italy		1		1			1												1	1		1	1		1	1	6	33.3333
San Maria d’Agnano (Puglia)	Italy				0			1											1			1	1	1		1	1	6	33.3333
Grotta dei Fanciulli (Liguria)	Italy				0			1										1			1	1	1			1	1	6	33.3333
Grotta dei Giganti (Puglia)	Italy		1		1			1										1		1		1		1		1	1	6	33.3333
Grotta del Fossellone (Lazio)	Italy		1	1	2			1							1			1		1		1				1	1	6	33.3333
Grotta dell'Addaura (Sicilia)	Italy				0			1										1	1	1		1		1			1	6	33.3333
Grottoni (Abruzzo)	Italy		1		1			1										1	1			1		1		1	1	6	33.3333
Ingarana (Foggia)	Italy				0			1										1				1	1	1		1	1	6	33.3333
Bryseny 1	Moldova		1	1	2			1									1	1	1	1			1	1				6	33.3333
Pestera Cioarei (Gorj)	Romania			1	1			1										1		1				1	1	1	1	6	33.3333
Betfia (Bihor)	Romania				0	1														1	1	1	1	1		1		6	33.3333
Denisova Cave (Altai)	Russia		1	1	2			1								1	1		1			1		1			1	6	33.3333
Avenc del Gegant (Barcelona)	Spain		1		1		1	1										1	1	1		1				1	1	6	33.3333
Cau d’en Borrás (Castellón)	Spain				0		1					1				1		1	1	1		1						6	33.3333
Cova Nova (Mallorca)	Spain				0			1										1				1		1	1	1	1	6	33.3333
Cueto de la Mina (Asturias)	Spain			1	1			1										1		1			1	1		1	1	6	33.3333
Amalda (Guipuzcoa)	Spain			1	1			1										1	1			1	1	1			1	6	33.3333
Cueva de Zafarraya (Malaga)	Spain		1		1			1					1	1	1									1		1	1	6	33.3333
Urtiaga (Guipuzcoa)	Spain			1	1			1						1				1		1			1			1	1	6	33.3333
Adzhi-Koba (Krim)	Ukraine		1	1	2		1												1	1				1	1	1	1	6	33.3333
Schusterlucke (Niederosterreich)	Austria				0			1											1	1				1		1	1	5	27.7778
Zwerglloch (Niederosterreich)	Austria				0			1											1	1		1		1	1			5	27.7778
Hundsheim (Niederosterreich)	Austria				0		1								1	1			1					1		1		5	27.7778
Bacho Kiro	Bulgaria		1	1	2			1										1		1			1			1	1	5	27.7778
Filipovska Cave	Bulgaria				0			1											1	1				1		1	1	5	27.7778
Balcarka (Moravia)	Czech Republic			1	1			1									1	1		1			1	1				5	27.7778
Abri Olha (Pyrenees-Atlantiques)	France		1		1			1														1	1	1		1	1	5	27.7778
Grotte de Laugerie-Basse (Dordogne)	France			1	1			1					1			1		1					1	1				5	27.7778
Grotte des Harpons (Haute-Garonne)	France			1	1			1							1			1						1		1	1	5	27.7778
La Colombierre (Aim)	France			1	1			1											1	1			1	1		1		5	27.7778
La Crouzade (Aude)	France		1	1	2			1					1					1					1			1	1	5	27.7778
Lacombe-Tayac (Dordogne)	France				0				1							1		1	1			1	1					5	27.7778
Rond-du-Barry (Haute-Loire)	France			1	1			1		1													1		1	1	1	5	27.7778
Grotte des Oiseaux (Dordogne)	France			1	1			1				1								1		1				1	1	5	27.7778
Gritulu Cave (Corse)	France				0			1					1				1			1			1	1				5	27.7778
Aurensan superieure (Hautes-Pyrenees)	France				0			1							1			1	1			1				1		5	27.7778
Balazuc (Ardeche)	France		1		1			1					1										1	1		1	1	5	27.7778
Abri Dufaure (Landes)	France			1	1			1										1	1				1	1			1	5	27.7778
Cap de la Biehle (Hautes-Pyrenees)	France				0		1									1		1					1	1			1	5	27.7778
Grotte Gazel (Aude)	France			1	1			1										1		1			1			1	1	5	27.7778
Grotte Jean-Pierre No 1 (Savoie)	France			1	1			1											1	1				1		1	1	5	27.7778
Tsutskvat (Grusinien (Imeretia))	Georgia		1		1			1								1		1	1							1	1	5	27.7778
Istallosko (Bukk)	Hungary			1	1			1											1	1		1		1		1		5	27.7778
Remetehegy (Buda hills)	Hungary				0			1									1		1			1	1			1		5	27.7778
Subalyuk (Bukk)	Hungary		1		1			1					1			1			1					1		1		5	27.7778
Jericho (West Bank)	Israel			1	1			1		1	1							1		1	1							5	27.7778
Ubeidiya (Galilee)	Israel	1			1	1												1	1	1		1	1					5	27.7778
Grotta delle Stalattiti o delle Pecore (Trapani)	Italy				0			1														1		1	1	1	1	5	27.7778
Grotta Polesini (Lazio)	Italy				0			1											1	1			1			1	1	5	27.7778
Grotta del Caviglione (Liguria)	Italy		1		1			1							1			1	1		1						1	5	27.7778
Mamutowa (Krakow)	Poland		1	1	2			1											1	1			1	1		1		5	27.7778
Komarowa Cave	Poland				0			1										1	1	1			1			1		5	27.7778
Karmalki (Tatar ASSR)	Russia				0			1				1									1		1	1	1			5	27.7778
Matzuka (Krasnodar)	Russia		1		1			1								1			1		1					1	1	5	27.7778
Atapuerca, Gran Dolina (Burgos)	Spain	1			1	1	1				1												1		1	1	1	5	27.7778
Cueva Negra del Estrecho del Río Quípar (Murcia)	Spain		1		1			1														1	1		1	1	1	5	27.7778
Sima de las Palomas del Cabezo Gordo (Murcia)	Spain		1		1		1															1		1	1	1	1	5	27.7778
Atapuerca, Sima del Elefante (Burgos)	Spain				0	1						1											1	1	1		1	5	27.7778
Bora Gran d'en Carreras (Gerona)	Spain			1	1			1				1								1		1	1			1		5	27.7778
El Castillo (Santander)	Spain		1	1	2			1								1			1	1			1	1				5	27.7778
Sewells Cave (Gibraltar)	Gibraltar				0			1							1				1			1	1	1				5	27.7778
Aveline's Hole (Somerset)	United Kingdom				0			1											1	1	1		1	1				5	27.7778
Prolom 2 (Krim)	Ukraine		1		1			1											1	1	1		1	1				5	27.7778
Kara-Koba (Krim)	Ukraine			1	1			1										1				1		1		1	1	5	27.7778
Merkenstein (Niederosterreich)	Austria				0			1				1								1				1		1		4	22.2222
Teufelslucken (Niederosterreich)	Austria				0			1								1			1			1		1				4	22.2222
Tropfsteinhohle (Steiermark)	Austria				0		1	1								1								1		1	1	4	22.2222
Drachenhohle bei Mixnitz (Steiermark)	Austria			1	1			1											1	1						1	1	4	22.2222
Gornja Bijambarska Pecina	Bosnia-Herzegovina			1	1			1											1	1		1		1				4	22.2222
Schafstallhohle (Baden-Wurttenberg)	Germany		1		1			1				1							1					1		1		4	22.2222
Schmiedberg-Abri bei Hirschach (Bayern)	Germany				0			1												1			1	1		1		4	22.2222
Buhlen Upper Rock Shelter (Hessen)	Germany		1		1			1												1		1		1			1	4	22.2222
Hunas (Bayern)	Germany				0		1	1												1	1		1			1		4	22.2222
Slivnitsa	Bulgaria				0	1													1	1				1		1		4	22.2222
Kozarnika cave	Bulgaria			1	1			1												1		1				1	1	4	22.2222
Schweizersbild (Schaffhausen)	Switzerland			1	1			1										1				1	1	1				4	22.2222
Choukoutien, Locality 15 (Hopei)	China				0		1												1	1		1		1				4	22.2222
Romualdo	Croatia			1	1			1												1	1	1					1	4	22.2222
Tatinja draga	Croatia		1		1		1												1			1	1				1	4	22.2222
Velika Pecina	Croatia				0			1											1	1			1				1	4	22.2222
Jirickova Skala (Bohemia)	Czech Republic				0			1												1		1	1	1				4	22.2222
Kulna (Moravia)	Czech Republic			1	1			1												1			1	1			1	4	22.2222
Grotte de Lacombe (Dordogne)	France		1	1	2			1					1										1	1		1		4	22.2222
Abri Suard (Charente)	France		1		1			1								1							1	1		1		4	22.2222
Grotte des Fees a Chatelperron (Allier)	France		1	1	2			1										1		1			1			1		4	22.2222
Abri de Campalou (Drome)	France			1	1			1										1	1					1		1		4	22.2222
La Grand Baille (Aim)	France			1	1			1							1							1				1	1	4	22.2222
Las Bufios (Ariege)	France		1	1	2			1										1		1			1			1		4	22.2222
Laugerie Haute (Dordogne)	France			1	1			1				1				1							1			1		4	22.2222
Laugerie Haute Est (Dordogne)	France			1	1			1															1	1		1	1	4	22.2222
Mas d'Azil (Ariege)	France			1	1			1								1							1	1		1		4	22.2222
Pair-non-Pair (Gironde)	France			1	1			1					1					1		1			1					4	22.2222
Pech de l'aze II (Dordogne)	France		1		1			1				1											1	1		1		4	22.2222
Pie Lombard (Alpes-Maritimes)	France		1		1			1										1				1				1	1	4	22.2222
Abri des Pecheurs (Ardeche)	France			1	1			1									1							1	1	1		4	22.2222
Tutto de Camayot (Ariege)	France			1	1			1										1				1	1			1		4	22.2222
Combe Sauniere 1 (Dordogne)	France			1	1			1												1			1	1		1		4	22.2222
L'Aven de Romain-La-Roche (Doubs)	France				0		1					1							1				1			1		4	22.2222
Marzal II (Ardèche)	France				0		1																1	1		1	1	4	22.2222
Abri Castanet (Dordogne)	France			1	1			1											1						1	1	1	4	22.2222
Bois-de-Brousses (Herault)	France			1	1			1														1	1	1		1		4	22.2222
Caverne d'Arcy-sur-Cure (Yonne)	France			1	1			1				1			1			1					1					4	22.2222
Flageolet I (Dordogne)	France			1	1			1												1			1	1		1		4	22.2222
Freydieres (Drome)	France			1	1			1										1						1		1	1	4	22.2222
Kudaro 3 (South Ossetia)	Georgia		1		1			1					1											1		1	1	4	22.2222
Dzhruchula (Imeretia)	Georgia		1		1			1											1					1		1	1	4	22.2222
Balla (Bukk)	Hungary			1	1			1											1				1	1		1		4	22.2222
Petenyi cave (Bukk)	Hungary				0			1											1				1	1		1		4	22.2222
Bivak (Pilis)	Hungary		1		1			1									1		1				1			1		4	22.2222
Netiv Hagdud (West Bank)	Israel			1	1			1		1									1	1		1						4	22.2222
Umm-Qatafa (Judea)	Israel		1		1		1								1					1	1	1						4	22.2222
Grotta Breuil (Latina)	Italy		1		1			1														1		1		1	1	4	22.2222
Grotta dei Fiori (Sardegna)	Italy				0			1					1										1			1	1	4	22.2222
Grotta della Serratura (Salerno)	Italy				0			1															1	1		1	1	4	22.2222
Caverna di Verezzi (Liguria)	Italy				0				1										1					1	1	1		4	22.2222
Caverna di Pollera (Liguria)	Italy				0				1										1			1	1			1		4	22.2222
Palidoro (Lazio)	Italy			1	1			1														1		1		1	1	4	22.2222
"Malta"	Malta				0				1						1			1				1	1					4	22.2222
Tsagan-Agui Cave (Gobian Altai)	Outer Mongolia		1	1	2			1										1						1	1		1	4	22.2222
Crvena Stijena	Montenegro			1	1			1												1			1	1		1		4	22.2222
Grottede Furninha (Leiria)	Portugal				0			1											1	1		1					1	4	22.2222
Gruta da Figueira Brava (Setubal)	Portugal		1		1			1		1								1						1			1	4	22.2222
Oblazowa 1 (Nowy Sacz)	Poland				0			1											1	1			1	1				4	22.2222
Oblazowa Cave (Nowy Sacz)	Poland				0			1											1	1		1		1				4	22.2222
Dyuktaiskaya Peshchera (Yakutia)	Russia			1	1			1		1							1	1						1				4	22.2222
Sibiryachikha cave (Altai)	Russia		1		1			1										1	1	1				1				4	22.2222
Grotta Dvuglaska (Yenisey)	Russia		1		1			1														1	1	1			1	4	22.2222
Dzerava Skala	Slovakia		1	1	2			1									1						1	1		1		4	22.2222
Cueva de Abauntz (Navarra)	Spain			1	1			1							1			1								1	1	4	22.2222
Bujero del Silo (La Gomera, Canarias)	Spain				0			1						1									1	1			1	4	22.2222
Cueva Hora (Granada)	Spain			1	1			1												1			1			1	1	4	22.2222
Cueva Volcan (Valencia)	Spain			1	1			1														1		1		1	1	4	22.2222
Cueva de Ambrosio (Almeria)	Spain			1	1			1											1						1	1	1	4	22.2222
La Riera (Asturias)	Spain			1	1			1										1					1	1			1	4	22.2222
Pedrera de S'Onix (Mallorca)	Spain				0	1										1			1			1					1	4	22.2222
Jarama VI (Guadalajara)	Spain		1		1			1											1			1				1	1	4	22.2222
"Derbyshire Peak Caves" (Derbyshire-Staffordshire)	United Kingdom				0			1										1		1			1	1				4	22.2222
Soldier's Hole (Somerset)	United Kingdom			1	1			1				1							1	1			1					4	22.2222
Nishnekrivchansk (Ternopol)	Ukraine				0		1												1	1			1	1				4	22.2222
Grosse Offenbergerhohle (Steiermark)	Austria				0			1																1		1	1	3	16.6667
Nixloch (Oberosterreich)	Austria				0			1																1		1	1	3	16.6667
Tunnelhohle (Steieremark)	Austria				0			1								1										1	1	3	16.6667
Teufelsrast-Knochenfuge (Niederösterreich)	Austria				0			1												1			1			1		3	16.6667
Luegloch (Steiermark)	Austria			1	1			1																1		1	1	3	16.6667
Trou des Nutons (Namur)	Belgium			1	1			1				1							1		1							3	16.6667
Badanj	Bosnia-Herzegovina				0			1												1	1	1						3	16.6667
Roter Berg bei Saalfeld (Thuringen)	Germany				0			1								1		1				1						3	16.6667
Spitzbubenhohle (Baden-Wurttenberg)	Germany			1	1			1											1	1	1							3	16.6667
Breitenberghohle bei Gossweintein (Bayern)	Germany				0		1	1											1	1		1						3	16.6667
Brillenhohle (Baden-Wurttemberg)	Germany			1	1			1												1				1		1		3	16.6667
Sesselfelsgrotte (Bayern)	Germany		1	1	2			1												1						1	1	3	16.6667
Einhornhohle (Bayern)	Germany			1	1			1											1		1	1						3	16.6667
Gaiskirche im Puttlachtal (Bayern)	Germany			1	1			1											1					1		1		3	16.6667
Karstein (Nordhein-Westfalen)	Germany			1	1			1											1	1				1				3	16.6667
Razhishkata Cave	Bulgaria				0			1												1						1	1	3	16.6667
Grotte de Cotencher (Neuenberg)	Switzerland		1		1			1										1					1			1		3	16.6667
Kessiloch (Bern)	Switzerland			1	1			1											1				1			1		3	16.6667
Kasslerloch (Schaffhausen)	Switzerland			1	1			1											1			1	1					3	16.6667
Rislisberghohle (Soleure)	Switzerland			1	1			1															1	1		1		3	16.6667
Thiersteiner hohle (Baselland)	Switzerland			1	1			1												1			1			1		3	16.6667
Vela Spilja	Croatia				0			1											1				1			1		3	16.6667
Podumci	Croatia		1		1		1													1		1	1					3	16.6667
Pod Hradem (Moravia)	Czech Republic		1	1	2			1												1		1		1				3	16.6667
Predmosti (Moravia)	Czech Republic			1	1			1							1			1					1					3	16.6667
Grotte de Gatzarria (Pyrenees-Atlantiques)	France		1	1	2			1															1			1	1	3	16.6667
Grotte de Tarte (Houste-Garonne)	France			1	1			1					1					1								1		3	16.6667
Grotte d'Aurignac (Haute Garonne)	France			1	1			1			1					1							1					3	16.6667
Grotte d'Embulla (Pyrenees-Orientale)	France			1	1			1										1			1					1		3	16.6667
Abri de Fontales (Tarn-et-Garonne)	France			1	1			1								1								1		1		3	16.6667
Les Balmes de Villereversure (Ain)	France				0			1										1					1			1		3	16.6667
Malarnaud (Ariege)	France				0			1									1	1								1		3	16.6667
Petit Puymoyen (Charente)	France		1		1			1								1			1	1								3	16.6667
Piage (Lot)	France		1	1	2			1															1	1		1		3	16.6667
Pont d'Ambon (Dordogne)	France			1	1			1										1		1				1				3	16.6667
Rochereil (Dordogne)	France			1	1			1													1					1	1	3	16.6667
Abri des Battuts (Tarn)	France			1	1			1										1					1	1				3	16.6667
Saint Romans (Isere)	France			1	1			1															1	1		1		3	16.6667
Salpetre a Remoulins (Gard)	France			1	1			1											1			1				1		3	16.6667
Trou Violet (Ariege)	France			1	1			1										1						1		1		3	16.6667
Castiglione 1 (Haute-Corse)	France				0		1													1						1	1	3	16.6667
Baume-Vallée (Haute-Loire)	France		1		1			1											1	1							1	3	16.6667
Coudoulous I (Lot)	France				0		1																1	1		1		3	16.6667
Grotte de Noisetier (Hautes-Pyrénées)	France				0			1															1	1		1		3	16.6667
Saint-Césaire ()	France		1	1	2		1	1					1					1					1					3	16.6667
Adaouste (Bouches-du-Rhone)	France		1	1	2			1															1			1	1	3	16.6667
Aldene (Herault)	France				0			1												1						1	1	3	16.6667
Balme-les-Grottes (Isere)	France			1	1			1												1		1				1		3	16.6667
Baume de Gonvillars (Haute-Saone)	France		1	1	2			1											1	1				1				3	16.6667
Bois-Ragot (Vienne)	France			1	1			1										1					1	1				3	16.6667
Comarque (Dordogne)	France			1	1			1															1	1		1		3	16.6667
Cottier a Retournac (Haute-Loire)	France				0			1																1		1	1	3	16.6667
Duruthy (Landes)	France			1	1			1										1					1			1		3	16.6667
Fontechevade (Charente)	France	1			1		1	1									1		1			1						3	16.6667
Abri Mege (Dordogne)	France			1	1			1				1											1	1				3	16.6667
Grotta di Funtanedu (Corse)	France				0			1												1				1			1	3	16.6667
Kva-Chara (South Abkhazia)	Georgia			1	1			1				1											1	1				3	16.6667
Petralona (Chalkidike)	Greece				0		1																1	1		1		3	16.6667
Cave SE Pigadia (Karpathos)	Greece				0		1	1				1									1	1						3	16.6667
Vraona (Attika)	Greece				0			1										1						1		1		3	16.6667
Gerani IV (Crete)	Greece				0			1					1							1						1		3	16.6667
Gumbes B (Crete)	Greece				0			1												1			1	1				3	16.6667
Jankovich (Gerecse)	Hungary		1	1	2			1											1				1			1		3	16.6667
Nagyharsany-hegy (1-4) (Villany)	Hungary				0	1													1	1				1				3	16.6667
Tarko (Bukk)	Hungary				0			1															1	1		1		3	16.6667
Villany 3 (Villany)	Hungary				0	1												1	1	1								3	16.6667
Catacomb Cave (Co. Clare)	Ireland				0			1											1	1			1					3	16.6667
Newhall Cave (Co. Clare)	Ireland				0			1											1	1			1					3	16.6667
Zawi Chemi Shanidar (Kurdistan)	Iraq			1	1			1				1	1		1													3	16.6667
Alghero (Sardegna)	Italy				0			1					1					1									1	3	16.6667
Spinagallo (Sicilia)	Italy				0		1												1					1		1		3	16.6667
Castelcivita (Salerno)	Italy		1		1			1																	1	1	1	3	16.6667
Grotta Marasà (Palermo)	Italy				0		1															1	1				1	3	16.6667
Grotta del Ponte (Palermo)	Italy				0		1													1				1			1	3	16.6667
Grotta di S. Teodoro (Messina)	Italy				0			1																1		1	1	3	16.6667
Grotta Inferno a Scala (Sardegna)	Italy				0			1										1		1						1		3	16.6667
Grotta Luparello (Palermo)	Italy				0		1													1		1	1					3	16.6667
Grotta di Parignana (Toscana)	Italy				0			1										1		1							1	3	16.6667
Riparo Salvini (Lazio)	Italy			1	1			1												1						1	1	3	16.6667
Ain Ghazal	Jordan			1	1			1						1				1				1						3	16.6667
Haua Fteah (Cyrenaica)	Libya		1	1	2			1												1				1	1			3	16.6667
Ksar 'Akil	Lebanon		1	1	2			1							1	1		1										3	16.6667
Lapa da Rainha (Leiria)	Portugal			1	1			1											1	1							1	3	16.6667
Deszczowa Cave	Poland				0			1												1			1	1				3	16.6667
Deszczowa Upper Rock Shelter	Poland				0			1												1			1	1				3	16.6667
Pestera Napisteleu (Bihor)	Romania				0			1							1					1		1						3	16.6667
Gudskiy Naves 1 (Krasnodar)	Russia		1	1	2			1														1	1			1		3	16.6667
Medvezhya peshchera (Northern Urals)	Russia				0			1											1			1		1				3	16.6667
Mezmaiskaya (Krasnador)	Russia		1		1			1								1										1	1	3	16.6667
Akhshatyr (Krasnador)	Russia		1	1	2			1										1	1								1	3	16.6667
Tonnelnaya Cave (Yenisey)	Russia				0			1											1					1			1	3	16.6667
Labeko Koba (Guipuzcoa)	Spain		1	1	2			1								1										1	1	3	16.6667
Cala'n Blanes B (Baleares)	Spain				0			1											1							1	1	3	16.6667
Jarama 2 (Castilla – La Mancha)	Spain			1	1			1												1				1		1		3	16.6667
Cueva de El Esquilleu (Cantabria)	Spain		1		1			1											1							1	1	3	16.6667
Cingle Vermell (Barcelona)	Spain				0			1												1				1			1	3	16.6667
Cova del Llenaire (Mallorca)	Spain				0			1										1								1	1	3	16.6667
Cueva de Ermittia (Guipuzcoa)	Spain			1	1			1										1								1	1	3	16.6667
Cueva de Hornos de la Pena (Santander)	Spain			1	1			1					1							1							1	3	16.6667
Cueva del Toll (Barcelona)	Spain		1		1			1															1			1	1	3	16.6667
Erralla Cave (Guipuzcoa)	Spain			1	1			1																1	1	1		3	16.6667
Gruta de Serinya (Gerona)	Spain			1	1			1										1					1			1		3	16.6667
Pinilla del Valle (Madrid)	Spain		1		1		1															1		1	1			3	16.6667
Arbreda II (Gerona)	Spain			1	1			1																1		1	1	3	16.6667
Chudleigh Cave (Devonshire)	United Kingdom				0			1												1				1			1	3	16.6667
Gough's Cave (Somerset)	United Kingdom				0			1										1		1							1	3	16.6667
Merlin's Cave (Herefordshire)	United Kingdom				0			1											1	1				1				3	16.6667
Roin Hood's Cave (Derbyshire)	United Kingdom		1	1	2			1											1	1				1				3	16.6667
Sun Hole (Somerset)	United Kingdom				0			1											1	1			1					3	16.6667
Kyzyl-Koba (Krim)	Ukraine				0	1	1													1						1	1	3	16.6667
Alimovskii Naves (Krim)	Ukraine			1	1			1											1	1						1		3	16.6667
Shaitan-Koba (Krim)	Ukraine		1		1			1											1	1				1				3	16.6667
Syuren 2 (Krim)	Ukraine			1	1			1											1					1			1	3	16.6667
Murzak Koba (Krim)	Ukraine				0			1												1		1					1	3	16.6667
Kiik-Koba (Krim)	Ukraine		1		1			1																1		1	1	3	16.6667
Teshik-Tash	Uzbekistan		1		1			1													1			1			1	3	16.6667
Jerevan	Armenia				0				1													1	1					2	11.1111
Repolusthohle (Steiermark)	Austria				0		1								1	1												2	11.1111
Gudenushohle (Niederosterreich)	Austria		1	1	2			1												1				1				2	11.1111
Trou de Chaleux (Namur)	Belgium			1	1			1				1												1				2	11.1111
Goyet (Namur)	Belgium		1	1	2			1							1	1												2	11.1111
Marie-Jeanne (Namur)	Belgium		1	1	2			1												1				1				2	11.1111
Zelena Pecina	Bosnia-Herzegovina				0			1											1	1								2	11.1111
Stellmoor (Schleswig-Holstein)	Germany			1	1			1										1				1						2	11.1111
Breitenfurter Hohle (Bayern)	Germany		1		1			1				1								1								2	11.1111
Wildweiberhaus-Felsen (Hessen)	Germany				0			1												1				1				2	11.1111
Buttnerloch bei Thuisbrunn (Bayern)	Germany				0			1											1	1								2	11.1111
Fuchsloch im Krockstein bei Rubeland (Sachsen-Anhalt)	Germany				0			1												1				1				2	11.1111
Grubenloch bei Oberklausen (Bayern)	Germany				0			1											1	1								2	11.1111
Bettelkuche bei Sulzbach-Rosenberg (Bayern)	Germany			1	1			1										1		1								2	11.1111
Kleine Scheuer im Lonetal (Baden-Wurttemberg)	Germany			1	1			1									1							1				2	11.1111
Kniegrotte (Thuringen)	Germany			1	1			1									1							1				2	11.1111
Bilzingsleben (Saschsen-Anhalt)	Germany				0		1					1												1				2	11.1111
Tsareva tsarkva	Bulgaria				0			1												1						1		2	11.1111
Balm bei Gunzberg (Soleure)	Switzerland				0			1												1				1				2	11.1111
Kastelhohle (Bern)	Switzerland			1	1			1										1								1		2	11.1111
Schlossfelsenhohle (Baselland)	Switzerland			1	1			1										1	1									2	11.1111
Schnurenloch (Bern)	Switzerland		1		1			1																		1	1	2	11.1111
Chilchli (Bern)	Switzerland				0			1												1						1		2	11.1111
Choukoutien, Locality 3 (Hopei)	China				0			1																1			1	2	11.1111
Choukoutien, Locality 18 (Hopei)	China				0	1														1	1							2	11.1111
Choukoutien, Locality 1 (Hopei)	China				0		1													1							1	2	11.1111
Krapina	Croatia		1		1			1				1			1													2	11.1111
Holstynska skala (Moravia)	Czech Republic				0			1												1			1					2	11.1111
Zechovice I (Bohemia)	Czech Republic				0			1												1				1				2	11.1111
Zechovice II (Bohemia)	Czech Republic				0			1												1				1				2	11.1111
Dolni Vestonice (Moravia)	Czech Republic			1	1			1												1			1					2	11.1111
Abeurador (Herault)	France			1	1			1																		1	1	2	11.1111
Grotte de Gouerris (Haute Garonne)	France			1	1			1											1							1		2	11.1111
Grotte de Lortet (Haute-Pyrenees)	France			1	1			1															1			1		2	11.1111
Grotte de Masset (Ariege)	France			1	1			1															1				1	2	11.1111
Grotte de Saint-Martin d'Excideuil (Dordogne)	France				0			1																		1	1	2	11.1111
Grotte de Sirejol (Lot)	France				0			1																		1	1	2	11.1111
Grotte de la Carriere a Gerde (Hautes-Pyrenees)	France				0		1	1															1			1		2	11.1111
Grotte de la Mairie(Dordogne)	France			1	1			1										1					1					2	11.1111
Grotte des Eglises (Ariege)	France			1	1			1															1			1		2	11.1111
Grotte des Rideaux (Haute Garonne)	France				0			1													1					1		2	11.1111
Grotte du Moustier (Dordogne)	France		1		1			1										1		1								2	11.1111
Grotte du Placard (Charente)	France			1	1			1										1					1					2	11.1111
Grotte du Tuteil (Ariege)	France		1		1		1	1											1							1		2	11.1111
Grotte d'Aure (?)	France				0				1													1				1		2	11.1111
Grotte des Baumas de Bails (Alpes-Maritimes)	France				0			1											1			1						2	11.1111
Jaurens a Nespouls (Correze)	France				0			1												1						1		2	11.1111
Abri de Pageyral (Dordogne)	France				0			1			1																1	2	11.1111
Laroque II (Herault)	France			1	1			1																	1	1		2	11.1111
Les Verlots (Cote-d'Or)	France				0	1																	1	1				2	11.1111
L'Aven des Planes (Vaucluse)	France				0			1														1				1		2	11.1111
Mas Rambault (Herault)	France				0	1																	1	1				2	11.1111
Abri Bourgeois-Delauny (Charente)	France		1	1	2			1								1							1					2	11.1111
Morin (Gironde)	France			1	1			1							1			1										2	11.1111
Trois Freres (Ariege)	France			1	1			1																1		1		2	11.1111
Vergisson 2 (Saone-et-Loire)	France		1		1			1																1		1		2	11.1111
Abri du Lagopede (Yonne)	France			1	1			1																1			1	2	11.1111
Abri du Facteur (Dordogne)	France			1	1			1										1								1		2	11.1111
Grotte de Bourrouilla (Pyrénées Atlantiques)	France			1	1			1															1				1	2	11.1111
Grotte du Tai 2 (Drôme)	France			1	1			1										1								1		2	11.1111
Carrière du Coustal à Noailles (Corrèze)	France				0		1																1			1		2	11.1111
Gouffre du Haut de la Coume des Arrat (Hautes Pyrénées)	France				0			1																		1	1	2	11.1111
Cimay a Evenos (Var)	France		1		1		1											1								1		2	11.1111
Abri Gay (Ain)	France			1	1			1																1		1		2	11.1111
Eden-Roc (Vaucluse)	France				0			1										1								1		2	11.1111
Grand Caveau du Verpant (Cote?d'Or)	France				0			1															1			1		2	11.1111
Gras a Escragnolles (Alpes-Maritimes)	France			1	1			1										1								1		2	11.1111
Grotte Noire (Pyrenees-Orientale)	France			1	1			1										1								1		2	11.1111
Kudaro 2 (South Ossetia)	Georgia		1	1	2			1																1			1	2	11.1111
Okumi I (Abkhazia)	Georgia		1	1	2			1																1		1		2	11.1111
Talyng-Leget (South Ossetia)	Georgia			1	1			1																1		1		2	11.1111
Tsona (South Ossetia)	Georgia		1		1		1	1					1														1	2	11.1111
Akhalkalaki	Georgia				0	1		1																1	1			2	11.1111
Gvardzhilas-Klde (Imeretia)	Georgia			1	1			1				1															1	2	11.1111
Mavro Mouri (Crete)	Greece				0			1					1							1								2	11.1111
Sourida fissure (Crete)	Greece				0			1										1		1								2	11.1111
Tylos ()	Greece				0			1												1				1				2	11.1111
Kalamakia Cave (Lakonia)	Greece				0			1											1	1								2	11.1111
Klisoura Cave I (Argolis)	Greece			1	1			1												1		1						2	11.1111
Elaichora 3 (Chalkidike)	Greece				0			1						1												1		2	11.1111
Kitsos (Attika)	Greece		1		1			1				1												1				2	11.1111
Baits (Gerecse)	Hungary				0			1												1			1					2	11.1111
Homan (Pilis)	Hungary				0			1												1						1		2	11.1111
Kiskevely (Pilis)	Hungary			1	1			1																1		1		2	11.1111
Beremend 16-17 (Villany)	Hungary				0	1																		1		1		2	11.1111
Szelim (Gerecse)	Hungary		1		1			1															1	1				2	11.1111
Vaskapu (Bukk)	Hungary			1	1			1																1		1		2	11.1111
Verteszollos 2 (Geresce)	Hungary				0		1								1				1									2	11.1111
Alice and Gwendolin Caves (Co. Clare)	Ireland				0			1											1				1					2	11.1111
Plunkett Cave (Co. Sligo)	Ireland				0			1													1			1				2	11.1111
Palegawra (Kurdistan)	Iraq			1	1			1						1										1				2	11.1111
Hatula (Judea)	Israel			1	1			1		1												1						2	11.1111
Mallaha (Galilee)	Israel			1	1			1												1		1						2	11.1111
Qumran Cave 24 (Dead Sea)	Israel			1	1			1												1		1						2	11.1111
Amud cave (Galilee)	Israel		1		1			1												1		1						2	11.1111
Valle Radice (Sora) (Frosinone)	Italy		1		1			1																		1	1	2	11.1111
Grotta Magiore di San Bernardino (Vicenza)	Italy				0			1										1								1		2	11.1111
Cava L di San Sidero (Lecce)	Italy				0			1											1			1						2	11.1111
Grotta di Poggio Schinaldi (Palermo)	Italy				0		1												1				1					2	11.1111
Casal Selce (Roma)	Italy				0		1					1							1									2	11.1111
Monte Tuttavista (Sardegna)	Italy				0	1																1				1		2	11.1111
Grotta Guattari (Lazio)	Italy				0			1											1							1		2	11.1111
Grotta S. Agostino (Lazio)	Italy		1		1			1																		1	1	2	11.1111
Grotta Titti (Puglia)	Italy		1		1			1												1			1					2	11.1111
Grotta dei Gerbai (Liguria)	Italy				0				1										1								1	2	11.1111
Grotta del Broion (Venetia)	Italy				0		1	1																1		1		2	11.1111
Grotta di Corbeddu (Sardegna)	Italy				0			1							1			1										2	11.1111
Grotta di Golino a Talamone (Toscana)	Italy			1	1			1											1							1		2	11.1111
Buca del Bersaglieri (Liguria)	Italy				0			1												1						1		2	11.1111
Monte San Giovani (Sardegna)	Italy				0		1				1					1												2	11.1111
Pianosa (Liguria)	Italy				0			1												1				1				2	11.1111
Riparo Zampieri (Venezia)	Italy		1		1			1																1		1		2	11.1111
Ghar Dalam	Malta			1	1		1	1							1							1						2	11.1111
Tal Herba Fissure	Malta				0				1						1			1										2	11.1111
Malisina stijena	Montenegro		1	1	2			1													1					1		2	11.1111
Staryje Duruitory	Moldova		1	1	2			1												1				1				2	11.1111
Grotte das Fontainhas (Lissabon)	Portugal				0				1											1							1	2	11.1111
Lagar Velho (Estremadura)	Portugal				0			1												1				1				2	11.1111
Dziadowa Skala (Katowice)	Poland				0			1												1				1				2	11.1111
Pestera Binder (Cluj)	Romania		1		1			1							1											1		2	11.1111
Pestera Climente I (Caras-Severin)	Romania			1	1			1															1			1		2	11.1111
Pestera Hotilor (Caras-Severin)	Romania				0			1																1		1		2	11.1111
Pestera cu Oase (Cluj)	Romania				0			1																1		1		2	11.1111
Il'skaya I (North Caucasus)	Russia		1		1			1								1			1									2	11.1111
Juresan basin (Chelyabinsk)	Russia			1	1			1											1			1						2	11.1111
Afontova Gora (Krasnoyarsk)	Russia			1	1			1												1			1					2	11.1111
Treugolnaya (Caucasus)	Russia		1		1			1																		1	1	2	11.1111
Nedostupnaya Cave (Yenisey)	Russia				0			1											1					1				2	11.1111
Bol'shoi Gluchoi (Middle Urals)	Russia			1	1			1											1					1				2	11.1111
Mehesz	Slovakia				0	1																		1		1		2	11.1111
Lukenjska jama	Slovenia				0			1										1					1					2	11.1111
Abric Romani (Barcelona)	Spain		1		1			1																		1	1	2	11.1111
Pontón de la Oliva (Madrid)	Spain				0			1												1							1	2	11.1111
Cau de Olopte (Gerona)	Spain				0			1																		1	1	2	11.1111
Casablanca I (Castello)	Spain				0	1							1									1						2	11.1111
Cova de Son Maiol (Mallorca)	Spain				0			1											1	1								2	11.1111
Cueva del Parco (Lerida)	Spain			1	1			1											1							1		2	11.1111
Cueva de las Tuxuneras (Barcelona)	Spain				0			1																		1	1	2	11.1111
El Pendo (Santander)	Spain			1	1			1							1							1						2	11.1111
El Salt (Alicante)	Spain		1		1			1																		1	1	2	11.1111
Lezetxiki (Guipuzcoa)	Spain		1		1			1																		1	1	2	11.1111
Malletes (Valencia)	Spain			1	1			1																		1	1	2	11.1111
Mollet I (Gerona)	Spain				0			1																		1	1	2	11.1111
S'Espasa (Gerona)	Spain				0			1																		1	1	2	11.1111
Meda Grande (Gerona)	Spain				0	1																				1	1	2	11.1111
Tossal de la Roca (Alicante)	Spain			1	1			1											1							1		2	11.1111
Cueva de Urratxa III (Bizkaia)	Spain			1	1			1					1													1		2	11.1111
Moleta Cave (Mallorca, Balearics)	Spain				0			1																		1	1	2	11.1111
Cova des Moro (Mallorca, Balearics)	Spain				0			1																		1	1	2	11.1111
Visoka pecina	Serbia				0			1											1	1								2	11.1111
Church Hole Cave (Derbyshire)	United Kingdom				0			1				1								1								2	11.1111
Clevedon Cave (Somerset)	United Kingdom				0			1				1											1					2	11.1111
Dowel Cave (Derbyshire)	United Kingdom				0			1												1				1				2	11.1111
Kirkdale Cave (Yorkshire)	United Kingdom				0			1															1				1	2	11.1111
Langwith Basset Cave (Derbyshire)	United Kingdom				0			1												1			1					2	11.1111
Ossiferous Fissure C8 (Derbyshire)	United Kingdom		1		1			1											1	1								2	11.1111
Ravencliffe cave (Derbyshire)	United Kingdom				0			1												1			1					2	11.1111
Torbryan Caves (collectively) (Devonshire)	United Kingdom				0			1												1			1					2	11.1111
Tsan'-Koba (Krim)	Ukraine			1	1			1											1					1				2	11.1111
Chokurcha (Krim)	Ukraine		1		1			1												1				1				2	11.1111
Fatma-Koba (Krim)	Ukraine			1	1			1												1						1		2	11.1111
Salzofenhohle (Steiermak)	Austria				0			1																			1	1	5.55556
Schlenkendurchgangshohle (Salzburg)	Austria				0			1																		1		1	5.55556
Schreiberwandhohle (Oberosterreich)	Austria				0			1												1								1	5.55556
Tischoferhohle (Tirol)	Austria				0			1																		1		1	5.55556
Deutsch-Altenburg (Niederosterreich)	Austria				0	1																		1				1	5.55556
Willendorf (Niederosterreich)	Austria			1	1			1										1										1	5.55556
Hohlensteinhohle (Steiermark)	Austria				0			1																		1		1	5.55556
Knochenhohle (Steiermark)	Austria				0			1																		1		1	5.55556
Griffener Tropfsteinhöhle (Kärnten)	Austria				0			1																		1		1	5.55556
Kleine Peggauerwandhöhle (Steiermark)	Austria				0			1															1					1	5.55556
Köhlerwandhöhle (Niederösterreich)	Austria				0			1											1									1	5.55556
Lurgrotte (Steiermark)	Austria				0			1																		1		1	5.55556
Rittersaal (Steiermark)	Austria				0			1																		1		1	5.55556
Eichmaierhohle (Niederosterreich)	Austria				0				1											1								1	5.55556
Trou de Frontal (Namur)	Belgium			1	1			1											1									1	5.55556
Trou de la Naulette (Namur)	Belgium				0			1														1						1	5.55556
Trou du Sureau (Namur)	Belgium			1	1			1											1									1	5.55556
Grotte du Bois Laiterie (Namur)	Belgium			1	1			1												1								1	5.55556
Liege (Liege)	Belgium				0				1				1															1	5.55556
Nische bei St. Wolfgang (Bayern)	Germany				0			1												1								1	5.55556
Nische im Velburger Schlossberg (Bayern)	Germany				0			1												1								1	5.55556
Oelknitz (Thuringen)	Germany			1	1			1															1					1	5.55556
Petershohle (Bayern)	Germany		1		1			1												1								1	5.55556
Probstfels (Baden-Wurttenberg)	Germany			1	1			1															1					1	5.55556
Salzgitter-Lebenstedt (Niedersachsen)	Germany				0			1								1												1	5.55556
Seveckenberg bei Quedlinburg (Sachsen-Anhalt)	Germany				0			1			1																	1	5.55556
Skythenloch (Bayern)	Germany				0			1																1				1	5.55556
Teufelsbrucke (Thuringen)	Germany			1	1			1																		1		1	5.55556
Teufelskuche (Baden-Wurttenberg)	Germany			1	1			1																		1		1	5.55556
ThieDet.Niedersachesen)	Germany				0			1															1					1	5.55556
Thorloc (Bayern)	Germany				0			1												1								1	5.55556
Unkelstein bei Remagen (Rheinland-Pfalz)	Germany				0			1															1					1	5.55556
Unterturkheim, Biedermannscher Steinbruch (Baden-Wurttemberg)	Germany				0			1																1				1	5.55556
Voigtstedt (Thuringen)	Germany				0		1															1						1	5.55556
Weinberghohlen bei Mauren (Bayern)	Germany			1	1			1															1					1	5.55556
Westeregeln bei Magdeburg (Sachsen-Anhalt)	Germany				0			1								1												1	5.55556
Wuste Scheuer (Thuringen)	Germany				0			1															1					1	5.55556
Zwergloch (Bayern)	Germany			1	1			1												1								1	5.55556
Jungfernhöhle ()	Germany				0			1																			1	1	5.55556
Das Felsstalle (Baden-Wurttemberg)	Germany			1	1			1																1				1	5.55556
Elisabethhohle (Bayern)	Germany				0			1												1								1	5.55556
Fohlenhaushohlen in Lonetal (Baden-Wurrtemberg)	Germany			1	1			1																1				1	5.55556
Fuchskirche (Thuringen)	Germany				0			1											1									1	5.55556
Fuchsloch bei Gleitsen (?)	Germany				0				1													1						1	5.55556
Grosse Rohrnloch (Bayern)	Germany				0			1											1									1	5.55556
Heidenschmiede (Baden-Wurrtemberg)	Germany		1	1	2			1												1								1	5.55556
Hermannshohle bei Rubeland (Sachsen-Anhalt)	Germany				0			1								1												1	5.55556
Hohler Fels bei Schelklingen (Baden-Wurrtemberg)	Germany			1	1			1												1								1	5.55556
Langenaubach (?)	Germany				0				1																	1		1	5.55556
Malerfels I (Baden-Wurttemberg)	Germany				0		1	1											1									1	5.55556
Mosbach (Hessen)	Germany				0		1	1							1													1	5.55556
Niedernau (Baden-Wurttemberg)	Germany			1	1			1															1					1	5.55556
Cherdzhenitsa	Bulgaria				0	1																					1	1	5.55556
Kozarskata Cave	Bulgaria				0			1												1								1	5.55556
Toplya Cave	Bulgaria				0			1												1								1	5.55556
Kunino	Bulgaria				0	1																					1	1	5.55556
Morovista Cave	Bulgaria				0		1																			1		1	5.55556
Karlukovo 4	Bulgaria				0			1																		1		1	5.55556
Mirizlivka	Bulgaria			1	1			1											1									1	5.55556
Grotte du Scé (Waadt)	Switzerland			1	1			1										1										1	5.55556
Hollenberg-Hohle 3 (Baselland)	Switzerland			1	1			1														1						1	5.55556
Kohlerhohle (Bern)	Switzerland			1	1			1										1										1	5.55556
Liesbergmuhle (Abri) (Baselland)	Switzerland		1		1			1					1															1	5.55556
Liesbergmuhle (Hohle) (Baselland)	Switzerland		1		1			1																		1		1	5.55556
Saint Brais I (Bern)	Switzerland		1		1			1																		1		1	5.55556
Wildkirchli (St Gallen)	Switzerland		1		1			1																		1		1	5.55556
Dentaux (Waadt)	Switzerland		1		1			1																			1	1	5.55556
Drachenloch (St Gallen)	Switzerland				0			1																		1		1	5.55556
Ettingen (Baselland)	Switzerland			1	1			1																		1		1	5.55556
Cave No 1 Chen Chihli (Hebei)	China				0				1															1				1	5.55556
Choukoutien, Locality 4 (Hopei)	China				0		1																	1				1	5.55556
Jing Niu Shan (Liaoning)	China				0		1											1										1	5.55556
Sjara-osso-gol (Nei Mongol)	China			1	1			1								1												1	5.55556
Razvode	Croatia		1		1		1																1					1	5.55556
Veternica	Croatia			1	1			1										1										1	5.55556
Pecina u Brini	Croatia				0			1														1						1	5.55556
Konieprusy (Bohemia)	Czech Republic				0		1																	1				1	5.55556
Michalova jeskyne (Moravia)	Czech Republic				0			1												1								1	5.55556
Pavlov (Moravia)	Czech Republic			1	1			1															1					1	5.55556
Pekarna (Moravia)	Czech Republic			1	1			1															1					1	5.55556
Prezletice (Bohemia)	Czech Republic				0		1																	1				1	5.55556
Pruchodice I (Moravia)	Czech Republic			1	1			1											1									1	5.55556
Rytirska u Macochy (Moravia)	Czech Republic		1	1	2			1															1					1	5.55556
Syrovy zleb (Moravia)	Czech Republic				0			1												1								1	5.55556
Zuzlavitz (Bohemia)	Czech Republic				0				1														1					1	5.55556
Zuzlavitz A (Bohemia)	Czech Republic				0			1															1					1	5.55556
Chlum 4C (Bohemia)	Czech Republic				0	1	1											1										1	5.55556
c-718 (Bohemia)	Czech Republic				0		1																			1		1	5.55556
Gebel Silsila III (Kom Ombo plain)	Egypt			1	1			1		1																		1	5.55556
Khor el Sil area (Kol Ombo plain)	Egypt			1	1			1										1										1	5.55556
Grotte Saint-Michel d'Arudy (Pyrenees-Atlantiques)	France			1	1			1															1					1	5.55556
Grotte Simard (Charente)	France		1		1			1													1							1	5.55556
Grotte de Brengues (Lot)	France				0				1																	1		1	5.55556
Grotte de Gargas (Hautes-Pyrenees)	France			1	1			1																		1		1	5.55556
Grotte de Lherm (Ariege)	France				0		1	1																		1		1	5.55556
Grotte de Nichet (Ardennes)	France				0			1																		1		1	5.55556
Grotte de Tibiran (Hautes-Pyrenees)	France			1	1			1																		1		1	5.55556
Grotte de la Gorge d'Enfer (Dordogne)	France			1	1			1								1												1	5.55556
Grotte de l'Homme Mort (Hautes-Pyrenees)	France				0			1																		1		1	5.55556
Grotte des Cedres (Var)	France		1		1		1																			1		1	5.55556
Grotte des Eyzies (Dordogne)	France			1	1			1																		1		1	5.55556
Abri du Calvaire (Hautes-Pyrenees)	France			1	1			1																		1		1	5.55556
Grotte des Hotetux (Ain)	France			1	1			1																		1		1	5.55556
Grotte du Fustie (Ariege)	France				0			1																		1		1	5.55556
Grotte du Portel (Ariege)	France			1	1			1																			1	1	5.55556
Grotte d'Ebbou (Ardeche)	France			1	1			1																		1		1	5.55556
Iguede Pepin (Lot)	France				0			1												1								1	5.55556
Iguede Saint-Sol-Belcastel (Lot)	France				0		1															1						1	5.55556
Abri de Rochedane (Doubs)	France			1	1			1																1				1	5.55556
Laugerie Haute Ouest (Dordogne)	France			1	1			1										1										1	5.55556
Abri de Roquecourbiere (Ariege)	France		1		1			1										1										1	5.55556
L'Esquicho-Grapaou (Gard)	France			1	1			1				1																1	5.55556
Maldidier (Dordogne)	France			1	1			1																		1		1	5.55556
Margine Cave (Corse)	France				0				1																		1	1	5.55556
Montousse 3 (Houtes-Pyrenees)	France				0		1																			1		1	5.55556
Montousse 5 (Houtes-Pyrenees)	France				0	1														1								1	5.55556
Nerthe (Bouches du Rhone)	France				0				1																	1		1	5.55556
Abri de Vauloubau (Vaucluse)	France				0			1					1															1	5.55556
Orciers (Haute Loire)	France			1	1			1																1				1	5.55556
Pech de l'Ajasse (Lot)	France				0			1																		1		1	5.55556
Phosphorites de Quercy (Tarn, Tarn-et-Garonne, Lot and Aveyron)	France				0				1																	1		1	5.55556
Abri de la Geniere (Ain)	France			1	1			1														1						1	5.55556
Puits de Peyreignes (Hautes-Pyrenees)	France				0			1																		1		1	5.55556
Ramandils (Aude)	France		1		1			1										1										1	5.55556
Roc de Marcamps (Gironde)	France			1	1			1										1										1	5.55556
Rois (Charente)	France			1	1			1										1										1	5.55556
Savigny (Haute-Savoie)	France				0			1												1								1	5.55556
Terra Amata (Alpes-Maritimes)	France		1		1		1											1										1	5.55556
Toga (Corse)	France				0			1																			1	1	5.55556
Abri du Blot (Haute-Loire)	France			1	1			1																			1	1	5.55556
Grotte Vaufrey (Dordogne)	France		1		1		1																			1		1	5.55556
Aven des Iboussières (Drôme)	France			1	1			1										1										1	5.55556
Grotte du Hyène ( )	France		1		1			1										1										1	5.55556
Unikoté (Pyrénées Atlantiques)	France		1		1			1																		1		1	5.55556
Abri superieur de Colombier (Ardeche)	France			1	1			1																		1		1	5.55556
Causse de Martel (Lot)	France				0			1																		1		1	5.55556
Grotte du Bison (Yonne)	France		1		1			1																		1		1	5.55556
Auzieres II a Methamis (Vaucluse)	France				0			1																		1		1	5.55556
Badegoule (Dordogne)	France			1	1			1																		1		1	5.55556
Balme de Glos (Isere)	France			1	1			1																		1		1	5.55556
Baume de Fontbregoua (Var)	France			1	1			1																		1		1	5.55556
Blassac (Haute-Loire)	France			1	1			1																		1		1	5.55556
Canecaude I (Aude)	France			1	1			1																		1		1	5.55556
Carriere Fournier (Drome)	France				0		1																	1				1	5.55556
Cauna de Belvis (Aude)	France		1	1	2			1																		1		1	5.55556
Combe-Cullier (Lot)	France			1	1			1																		1		1	5.55556
Desmoiselles (Dordogne)	France				0				1															1				1	5.55556
Deux Avens (Ardeche)	France			1	1			1																		1		1	5.55556
Es Taliens (Hautes-Pyrenees)	France				0		1											1										1	5.55556
Farincourt (Haute-Marne)	France			1	1			1																		1		1	5.55556
Gare de Couze (Dordogne)	France			1	1			1								1												1	5.55556
Grotta di Brietta (Corse)	France				0			1											1									1	5.55556
Grotte Noelle (Hautes-Pyrenees)	France				0			1																		1		1	5.55556
Abkhaskie pamyatniki (Abkhazia)	Georgia				0				1														1					1	5.55556
Shagat-Khokh-Leget (South Ossetia)	Georgia		1	1	2			1														1						1	5.55556
Zurtaketi	Georgia			1	1			1																			1	1	5.55556
Kep Bogaz (Abkhazia)	Georgia			1	1			1																1				1	5.55556
Nesakia (Cerigo)	Greece				0				1												1							1	5.55556
Rethymnon fissure (Crete)	Greece				0			1							1													1	5.55556
Simonelli cave (Crete)	Greece				0			1							1													1	5.55556
Gumbes C (Crete)	Greece				0			1												1								1	5.55556
Dorog (Pilis)	Hungary				0		1												1									1	5.55556
Erd (Buda hills)	Hungary		1		1			1																1				1	5.55556
Herman Otto Cave (Bukk)	Hungary		1		1			1																1				1	5.55556
Horvolgy (Bukk)	Hungary				0		1																	1				1	5.55556
Kalman Lambrecht Cave (Bukk)	Hungary				0			1							1													1	5.55556
Ballavolgy (Bukk)	Hungary			1	1			1																1				1	5.55556
Merk	Hungary				0			1										1										1	5.55556
Remete cave (Buda hills)	Hungary		1		1			1																1				1	5.55556
Somssichhegy 2 (Villany)	Hungary				0	1																		1				1	5.55556
Sutto 1,2,4 (Gerecse)	Hungary				0		1	1																1				1	5.55556
Szeleta (Bukk)	Hungary				0				1				1															1	5.55556
Tokod-Nagyberek (Pilis)	Hungary				0			1												1								1	5.55556
Uppony 1 (Buda hills)	Hungary				0		1													1								1	5.55556
Beremend (Late Pleistocene Loess) (Villany)	Hungary				0			1								1												1	5.55556
Olyveskoer Fuchsoch (Bukk)	Hungary				0			1					1															1	5.55556
Ordoglyuk (Buda hills)	Hungary				0		1																				1	1	5.55556
Beremend 15 (Villány)	Hungary				0	1																		1				1	5.55556
Csakvar (Vertes)	Hungary			1	1			1												1								1	5.55556
Shandon Cave (Co. Waterford)	Ireland				0			1															1					1	5.55556
Ballynamintra Cave (Co. Waterford)	Ireland				0			1																1				1	5.55556
Barntick Cave (Co. Clare)	Ireland				0			1															1					1	5.55556
Castlepook Cave (Co. Cork)	Ireland				0			1											1									1	5.55556
Coffey Cave (Co. Sligo)	Ireland				0			1												1								1	5.55556
Asiab (Kermanshah valley)	Iran				0			1							1													1	5.55556
Qermez Dere (Kurdistan)	Iraq				0			1						1														1	5.55556
Sefunim Shelter (Mt Carmel)	Israel			1	1			1							1													1	5.55556
Gilgal (West Bank)	Israel			1	1			1														1						1	5.55556
S. Croce di Bisceglie (Puglia)	Italy			1	1			1																		1		1	5.55556
Tane del Diavolo (Orvieto)	Italy				0				1																		1	1	5.55556
Taurisano a Maglie (Puglia)	Italy				0			1										1										1	5.55556
Velika Jama (Udine)	Italy			1	1			1										1										1	5.55556
Abri Soman (Verona)	Italy			1	1			1										1										1	5.55556
Contrada Fusco (Siracusa)	Italy				0		1								1													1	5.55556
Acquedolci (Sicilia)	Italy				0		1								1													1	5.55556
Cala Genovesi a Levanzo (Sicilia)	Italy			1	1			1															1					1	5.55556
Cretone (Roma)	Italy				0		1													1								1	5.55556
Grotta del Cavallo (Lecce)	Italy		1		1			1																			1	1	5.55556
Contrada Pianetti (Ragusa)	Italy				0			1																			1	1	5.55556
Cala di Luna (Sardegna)	Italy				0			1										1										1	5.55556
Cave Pirro-dell’Erba (Foggia)	Italy				0	1													1									1	5.55556
Carnello (Sora) (Lazio)	Italy		1		1			1										1										1	5.55556
Avetrana (Taranto)	Italy				0			1																		1		1	5.55556
Cava C1 di S. Isidoro (Puglia)	Italy				0			1														1						1	5.55556
Cava E di S. Isidoro (Puglia)	Italy				0			1												1								1	5.55556
Caverna del Pastore (Liguria)	Italy				0			1																		1		1	5.55556
Covolo di Trene (Vicenza)	Italy				0			1																		1		1	5.55556
Formazione Stagnale (Lazio)	Italy				0			1							1													1	5.55556
Frascati (Lazio)	Italy				0			1							1													1	5.55556
Grotta Zinzulusa (Puglia)	Italy			1	1			1								1												1	5.55556
Grotta all'Onda (Toscana)	Italy			1	1			1														1						1	5.55556
Grotta del Uzzo (Sicilia)	Italy				0			1																		1		1	5.55556
Grotta di Cucigliana (Toscana)	Italy				0				1													1						1	5.55556
Grotta di Veja A (Verona)	Italy		1		1			1																		1		1	5.55556
Grotta Verdi di Pradis (Pordenone)	Italy		1	1	2			1																		1		1	5.55556
Buca del Tasso (Toscana)	Italy		1		1			1											1									1	5.55556
Pertugio della Volpe (Como)	Italy				0				1										1									1	5.55556
Riparo Mezzena (Verona)	Italy		1		1			1																		1		1	5.55556
Rose-Mary (?)	Italy				0				1						1													1	5.55556
Pinza-abu (Okinawa)	Japan				0			1				1																1	5.55556
Oetrange	Luxembourg			1	1			1																			1	1	5.55556
Bengisa gap	Malta				0				1						1													1	5.55556
Zebbug Cave	Malta				0				1						1													1	5.55556
Mista Cavern	Malta				0				1											1								1	5.55556
Gandia fissure	Malta				0				1						1													1	5.55556
Trinki	Moldova			1	1			1												1								1	5.55556
Vykhvatintsy cave	Moldova				0				1											1								1	5.55556
Jebel Irhoud	Morocco				0		1	1											1									1	5.55556
Bunde (Limburg)	Netherlands				0																1							1	5.55556
Tegelen (Limburg)	Netherlands				0	1						1																1	5.55556
Losser (Overijssel)	Netherlands				0			1				1																1	5.55556
Blomvag (Hordaland)	Norway				0			1															1					1	5.55556
Sao Lourenco peninsula (Madeira)	Portugal				0			1																1				1	5.55556
Grotte d’Escoural	Portugal		1	1	2			1											1									1	5.55556
Almonda (Estremadura)	Portugal		1		1		1																1					1	5.55556
Kozi Grzbiet (Swietokrzyskie)	Poland		1		1		1																	1				1	5.55556
Koziarnia (Krakow)	Poland		1		1			1				1																1	5.55556
Oblazowa 2 (Nowy Sacz)	Poland				0			1																1				1	5.55556
Raj (Swietokrzyskie)	Poland				0			1															1					1	5.55556
Zalas (Krakow)	Poland			1	1			1																1				1	5.55556
Jaskinia IV (Mount Birow)	Poland			1	1			1																		1		1	5.55556
Pestera Gura Cheii (Brasov)	Romania			1	1			1																		1		1	5.55556
Pestera Icoana (Caras-Severin)	Romania				0			1															1					1	5.55556
Pestera Igrita (Bihor)	Romania				0			1				1																1	5.55556
Pestera Izbindis (Bihor)	Romania				0			1												1								1	5.55556
Pestera Muierii (Gorj)	Romania				0			1										1										1	5.55556
Pestera Rece (Dimbovita)	Romania				0			1							1													1	5.55556
Pestera Tibicoaia (Bihor)	Romania				0			1																1				1	5.55556
Pestera Ursilor (Bihor)	Romania				0			1																		1		1	5.55556
Cheile Virghisului (Covasna)	Romania				0			1												1								1	5.55556
Khotylevo II (Bryansk)	Russia			1	1			1															1					1	5.55556
Maly Vorontsovskaya Peshchera (Krasnodar)	Russia		1		1			1																			1	1	5.55556
Mal'ta (Angara)	Russia			1	1			1															1					1	5.55556
Sergievskaya (Southern Urals)	Russia				0			1											1									1	5.55556
Yeliseyevichi (Bryansk)	Russia			1	1			1															1					1	5.55556
Kepshinskaya Peshchera (Krasnador)	Russia		1		1			1																		1		1	5.55556
Strashnaya Cave (Altai)	Russia			1	1			1												1								1	5.55556
Barakaeskaya Peshchera (Krasnador)	Russia		1		1			1															1					1	5.55556
Bliznets (Primorsky krai)	Russia				0			1														1						1	5.55556
Gubs shelter No. 1 (Krasnodar)	Russia		1		1			1															1					1	5.55556
Aidashinskaya Cave	Russia			1	1			1														1						1	5.55556
Shaitanoozersko kamenny ostrov (Urals)	Russia				0			1														1						1	5.55556
Gombaszog	Slovakia				0		1																	1				1	5.55556
Zupanov spodmol	Slovenia				0			1																			1	1	5.55556
Hude Luknje	Slovenia				0			1																		1		1	5.55556
Lukenjska Jama	Slovenia			1	1			1										1										1	5.55556
Sierra de Quibas (Murcia)	Spain				0	1							1															1	5.55556
La Cueva del Llano (Canaries)	Spain				0			1				1																1	5.55556
Avenc de na Corna (Mallorca)	Spain				0			1																		1		1	5.55556
Pala da Vella (Ourense)	Spain				0			1																		1		1	5.55556
Sa Segonya (Baleares)	Spain				0		1												1									1	5.55556
Incarcal 1 (Girona)	Spain				0	1												1										1	5.55556
Gabasa I (Huesca)	Spain				0			1							1													1	5.55556
Beefsteak Cave (Gibraltar)	Gibraltar				0			1																1				1	5.55556
Cova de la Guineu (Guardiola de Fontrubí, Catalonia)	Spain				0			1																	1			1	5.55556
La Carihuela (Granada)	Spain		1		1			1																		1		1	5.55556
Berroberia (Navarra)	Spain			1	1			1																		1		1	5.55556
Niño (Albacete)	Spain			1	1			1																			1	1	5.55556
Cova Forada (Alicante)	Spain		1		1			1																			1	1	5.55556
El Muscle (Barcelona)	Spain				0		1																1					1	5.55556
Brechas de la Cantera de l'Altissen (Barcelona)	Spain				0			1										1										1	5.55556
Cala Blanes (Menorca)	Spain				0			1																			1	1	5.55556
Cova des Moro (Mallorca)	Spain				0			1																		1		1	5.55556
Altamira (Santander)	Spain			1	1			1								1												1	5.55556
Cueva Juan Berchmans (Burgos)	Spain				0			1												1								1	5.55556
Cueva de Campana de Pinar (Granada)	Spain			1	1			1																		1		1	5.55556
Cueva de Laminak II (Vizcaya)	Spain				0			1																1				1	5.55556
Cueva de Lumentxa (Vizcaya)	Spain			1	1			1																			1	1	5.55556
Cueva del Caballon (Burgos)	Spain				0			1												1								1	5.55556
Cueva del Conde (Oviedo)	Spain		1		1			1																		1		1	5.55556
Cueva la Blanca (Burgos)	Spain				0			1												1								1	5.55556
Cuevona (Asturias)	Spain			1	1			1							1													1	5.55556
Ekain (Guipuzcoa)	Spain			1	1			1																		1		1	5.55556
Genista Cave 4A (Gibraltar)	Gibraltar		1	1	2			1								1												1	5.55556
Las Yedras (Granada)	Spain				0			1										1										1	5.55556
Roc de la Melca (Gerona)	Spain			1	1			1												1								1	5.55556
Sant-Gregori (Tarragona)	Spain			1	1			1															1					1	5.55556
Son Bauza (Mallorca)	Spain				0				1										1									1	5.55556
Aridos 1 (Madrid)	Spain		1		1		1													1								1	5.55556
Cueva de la Guineu (Barcelona)	Spain			1	1			1																	1			1	5.55556
Pecurski kamen	Serbia				0			1																			1	1	5.55556
Chelm's Combe Shelter (Somerset)	United Kingdom				0			1																1				1	5.55556
Cotte de Saint Brelade (Jersey)	United Kingdom		1		1			1																1				1	5.55556
Creswell Caves (Derbyshire)	United Kingdom				0			1															1					1	5.55556
Dalling (Norfolk)	United Kingdom				0				1													1						1	5.55556
Bacon Hole (Glamorgan)	United Kingdom				0			1			1																	1	5.55556
Happaway Cave (Devonshire)	United Kingdom				0			1															1					1	5.55556
Ossom's Cave (Staffordshire)	United Kingdom				0			1												1								1	5.55556
Paviland (Glamorgan)	United Kingdom				0			1																			1	1	5.55556
Tornewton Cave (Devonshire)	United Kingdom				0			1															1					1	5.55556
Walthamstow (Essex)	United Kingdom				0			1				1																1	5.55556
Cathole (Glamorgan)	United Kingdom			1	1			1				1																1	5.55556
Kosh-Koba (Krim)	Ukraine		1		1			1																			1	1	5.55556
Mezhirich (Cherkassy)	Ukraine			1	1			1															1					1	5.55556
Novgorod-Siversk (Novgorod-Siversk)	Ukraine			1	1			1																1				1	5.55556
Staroselye (Krim)	Ukraine		1		1		1																	1				1	5.55556
Zaskalnaya V (Krim)	Ukraine		1		1			1										1										1	5.55556
Zmeinogo Naves (Krim)	Ukraine				0			1											1									1	5.55556
