# Supplementary material for: Birds of a Feather: Neanderthal Exploitation of Raptors and Corvids
Source: PLoS One. 2012 Sep 17;7(9):e45927. doi: 10.1371/journal.pone.0045927 (PMC3444460; doi:10.1371/journal.pone.0045927)
Supplement: Table S6 — Taxonomical representation in Palaeolithic sites (Middle and Upper) compared to paleontological sites, tested by chi-square. Note species names follow sequence of first three letters of genus and species names -Refer to Table 1 and Table S1-. Fox example, PERAPI is Pernis Apivorus. (XLS) [file pone.0045927.s006.xls]

## Sheet: Table S6
Table S6. Taxonomical representation in Paleolithic sites (Middle and Upper) compared to paleontological sites, tested by chi-square.
PERAPI	pres	abs	tot	MILMIG	pres	abs	tot	MILMIL	pres	abs	tot	MILVUS	pres	abs	tot	HALALB	pres	abs	tot	HALIAA	pres	abs	tot	GYPBAR	pres	abs	tot	GYPAET	pres	abs	tot	NEOPER	pres	abs	tot	GYPFUL	pres	abs	tot	GYPS	pres	abs	tot	AEGMON	pres	abs	tot	AEGYPI	pres
obs
mp	3	244	247		4	243	247		2	245	247		6	241	247		17	230	247		20	227	247		18	229	247		20	227	247		3	244	247		18	229	247		22	225	247		28	219	247		30
up	1	526	527		11	516	527		4	523	527		16	511	527		22	505	527		24	503	527		26	501	527		27	500	527		7	520	527		23	504	527		27	500	527		23	504	527		24
pal	3	923	926		2	924	926		6	920	926		12	914	926		32	894	926		40	886	926		17	909	926		17	909	926		4	922	926		16	910	926		35	891	926		29	897	926		29
	7	1693	1700		17	1683	1700		12	1688	1700		34	1666	1700		71	1629	1700		84	1616	1700		61	1639	1700		64	1636	1700		14	1686	1700		57	1643	1700		84	1616	1700		80	1620	1700		83
exp
mp	1.01706	245.983			2.47	244.53			1.74353	245.256			4.94	242.06			10.3159	236.684			12.2047	234.795			8.86294	238.137			9.29882	237.701			2.03412	244.966			8.28176	238.718			12.2047	234.795			11.6235	235.376			12.0594
up	2.17	524.83			5.27	521.73			3.72	523.28			10.54	516.46			22.01	504.99			26.04	500.96			18.91	508.09			19.84	507.16			4.34	522.66			17.67	509.33			26.04	500.96			24.8	502.2			25.73
pal	3.81294	922.187			9.26	916.74			6.53647	919.464			18.52	907.48			38.6741	887.326			45.7553	880.245			33.2271	892.773			34.8612	891.139			7.62588	918.374			31.0482	894.952			45.7553	880.245			43.5765	882.424			45.2106
X2	3.8661	0.0159851			0.947733	0.00957306			0.0377264	0.000268197			0.227449	0.00464182			4.33094	0.188764			4.97895	0.258807			9.41965	0.350579			12.315	0.481761			0.45864	0.0038084			11.4039	0.39563			7.86154	0.408644			23.0729	1.1394			26.6899
	0.630829	0.00260827			6.23015	0.0629308			0.0210753	0.000149824			2.82843	0.057723			4.54339e-06	1.98024e-07			0.159816	0.00830725			2.65828	0.0989354			2.58395	0.101084			1.63032	0.0135377			1.60775	0.055777			0.0353917	0.00183967			0.130645	0.00645161			0.116319
	0.173324	0.000716637			5.69197	0.0574946			0.04403	0.000313009			2.29538	0.0468444			1.15177	0.0502001			0.723925	0.0376298			7.92479	0.294943			9.1512	0.357993			1.724	0.0143155			7.29347	0.25303			2.52815	0.131414			4.87588	0.240784			5.81243
sum	4.67026	0.01931			12.8699	0.129998			0.102832	0.000731031			5.35125	0.109209			5.48271	0.238964			5.86269	0.304744			20.0027	0.744458			24.0502	0.940838			3.81296	0.0316616			20.3051	0.704437			10.4251	0.541898			28.0794	1.38664			32.6187
X2 stat	4.68957				12.9998				0.103563				5.46046				5.72168				6.16743				20.7472				24.991				3.84462				21.0095				10.967				29.4661				34.293
	NS				NS				NS				NS				NS				<0.01				<0.001				<0.001				NS				<0.001				<0.01				<0.001				<0.001
UPPER V MIDDLE PAL COMPARISONS
obs
mp	3	244	247		4	243	247		2	245	247		6	241	247		17	230	247		20	227	247		18	229	247		20	227	247		3	244	247		18	229	247		22	225	247		28	219	247		30
up	1	526	527		11	516	527		4	523	527		16	511	527		22	505	527		24	503	527		26	501	527		27	500	527		7	520	527		23	504	527		27	500	527		23	504	527		24
	4	770	774		15	759	774		6	768	774		22	752	774		39	735	774		44	730	774		44	730	774		47	727	774		10	764	774		41	733	774		49	725	774		51	723	774		54
exp
mp	1.27649	245.724			4.78682	242.213			1.91473	245.085			7.02067	239.979			12.4457	234.554			14.0413	232.959			14.0413	232.959			14.9987	232.001			3.19121	243.809			13.084	233.916			15.637	231.363			16.2752	230.725			17.2326
up	2.72351	524.276			10.2132	516.787			4.08527	522.915			14.9793	512.021			26.5543	500.446			29.9587	497.041			29.9587	497.041			32.0013	494.999			6.80879	520.191			27.916	499.084			33.363	493.637			34.7248	492.275			36.7674
X2	2.32709	0.0120888			0.129332	0.00255596			0.00379751	2.9668e-05			0.148386	0.00434109			1.66654	0.0884286			2.52865	0.152412			1.11606	0.0672693			1.66767	0.107814			0.0114574	0.000149966			1.84709	0.103316			2.58928	0.174999			8.44666	0.595823			9.45928
	1.09069	0.00566591			0.0606166	0.00119796			0.00177986	1.39051e-05			0.0695472	0.00203463			0.781092	0.0414457			1.18515	0.0714339			0.523086	0.0315285			0.781622	0.0505313			0.00536997	7.02876e-05			0.865713	0.0484232			1.21357	0.0820206			3.95887	0.279257			4.43348
sum	3.41778	0.0177547			0.189948	0.00375392			0.00557736	4.35732e-05			0.217933	0.00637571			2.44763	0.129874			3.7138	0.223845			1.63914	0.0987978			2.44929	0.158345			0.0168274	0.000220253			2.7128	0.151739			3.80285	0.25702			12.4055	0.875079			13.8928
X2 stat	3.43553				0.193702				0.00562094				0.224309				2.57751				3.93764				1.73794				2.60764				0.0170476				2.86454				4.05987				13.2806				14.9347
	NS				NS				NS				NS				NS				<0.05				NS				NS				NS				NS				<0.05				<0.001				<0.001
Note species names follow sequence of first three letters of genus and species names -Refer to Table 1-. Fox example, PERAPI is Pernis Apivorus
[truncated: 166 more columns]
